# Supplementary material for: Protocol for an exploration of knowledge sharing for improved discharge from a mental health ward
Source: PubMed Central journal article supplement — BMJ Open. 2014 Oct 1;4(9):e005176. doi: 10.1136/bmjopen-2014-005176 (PMC4185338; doi:10.1136/bmjopen-2014-005176), 2014-10-01
Supplement: bmjopen-2014-005176.draft_revisions.pdf [file bmjopen-2014-005176.draft_revisions.pdf]

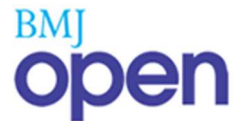

**Protocol for a qualitative exploration of knowledge sharing  
for improved discharge from a mental health ward**

|                                 |                                                                                                                                                                                                                                                                                                                                                                                                                                                                                                                        |
|---------------------------------|------------------------------------------------------------------------------------------------------------------------------------------------------------------------------------------------------------------------------------------------------------------------------------------------------------------------------------------------------------------------------------------------------------------------------------------------------------------------------------------------------------------------|
| Journal:                        | <i>BMJ Open</i>                                                                                                                                                                                                                                                                                                                                                                                                                                                                                                        |
| Manuscript ID:                  | bmjopen-2014-005176                                                                                                                                                                                                                                                                                                                                                                                                                                                                                                    |
| Article Type:                   | Protocol                                                                                                                                                                                                                                                                                                                                                                                                                                                                                                               |
| Date Submitted by the Author:   | 03-Mar-2014                                                                                                                                                                                                                                                                                                                                                                                                                                                                                                            |
| Complete List of Authors:       | Rowley, Emma; University of Nottingham, Centre for Health Innovation, Leadership & Learning / Nottingham University Business School<br>Wright, Nicola; University of Nottingham, School of Health Sciences<br>Waring, Justin; University of Nottingham, Centre for Health Innovation, Leadership & Learning / Nottingham University Business School<br>Chopra, Arun; Nottinghamshire Healthcare Trust, Adult Mental Health Services<br>Gregoriou, Kyri; Nottinghamshire Healthcare Trust, Adult Mental Health Services |
| <b>Primary Subject Heading</b>: | Mental health                                                                                                                                                                                                                                                                                                                                                                                                                                                                                                          |
| Secondary Subject Heading:      | Health services research                                                                                                                                                                                                                                                                                                                                                                                                                                                                                               |
| Keywords:                       | MENTAL HEALTH, Knowledge Sharing, Patient Admission, Patient discharge, Improvement Science                                                                                                                                                                                                                                                                                                                                                                                                                            |
|                                 |                                                                                                                                                                                                                                                                                                                                                                                                                                                                                                                        |

SCHOLARONE™  
Manuscripts

Only

**Title:**

Protocol for a qualitative exploration of knowledge sharing for improved discharge from a mental health ward.

**Corresponding author:**

Emma Rowley, Centre for Health Innovation, Leadership & Learning, Nottingham University Business School, c/o Institute of Mental Health, University of Nottingham Innovation Park, Triumph Road, Nottingham, NG7 2TU. Email: [emma.rowley@nottingham.ac.uk](mailto:emma.rowley@nottingham.ac.uk). Telephone: 0115 82 31313.

**Co-authors:**

Nicola Wright, School of Health Sciences, University of Nottingham, UK.

Justin Waring, Centre for Health Innovation, Leadership & Learning, Nottingham University Business School, Nottingham, UK.

Kyri Gregoriou, Adult Mental Health, Nottinghamshire Healthcare NHS Trust, Nottingham, UK.

Arun Chopra, Adult Mental Health, Nottinghamshire Healthcare NHS Trust, Nottingham, UK.

**MeSH terms:**

Mental health, knowledge sharing, patient admission, patient discharge, improvement science.

**Word count:**

5435

## ABSTRACT

**Introduction:** Strategies to reduce hospital admissions for mental health service users have received vast amounts of attention, yet the transfer of care from hospital to the community has been ignored. The discharge process is complex, messy, disjointed and inefficient, relying on cross agency and organisational working. Focusing on one acute mental health admission ward, we will investigate whether the discharge process for people with severe mental health problems can be enhanced, through the creation, implementation and utilisation of a knowledge sharing proforma which is used upon their admission to the ward.

**Methods & analysis:** The project uses qualitative interviews to understand the complex processes associated with being admitted and discharged from inpatient mental health wards. Practitioners will be asked to identify and map the relevant stakeholders involved in admission and discharge, and discuss any problems with the process. Following this, the study team will work with clinicians to develop a knowledge collection proforma. This will be piloted for 2 months, after which qualitative interviews will be carried out to collect reflections on the experiences of using the tool, with data used for further refinement of the intervention. Baseline and repeat quantitative measures will be taken to illustrate any changes to length of stay and readmission rates achieved as a result of the study.

**Ethics & dissemination:** A key issue is that participants are able to comment frankly on something which is a core part of their work, without fear or reprisal. It is equally important that all participants are offered the opportunity to develop and co-produce the knowledge collection proforma, in order that the intervention produced is fit for purpose and usable in the real world, away from a research environment. The study has received ethical approval from Nottingham University Business School, and has all appropriate NHS governance clearances.

## INTRODUCTION

The Care Quality Commission, the UK's healthcare regulator, has recently suggested that the lack of psychiatric inpatient beds is causing stress to services and patients.<sup>1</sup> At the same time, there is growing evidence that Approved Mental Health Professionals are detaining people under a section, illegally, in order to obtain a bed (Hudson and Webber 2012, Chopra 2013).<sup>2,3</sup>

In the UK, 10% of psychiatric beds (1,700 beds) have been cut over the last year.<sup>4</sup> Conversely, the numbers of people detained under the Mental Health Act reached a record high in 2011/12 with 48,600 people being detained, a 5% rise on 2010/11 levels.<sup>4</sup>

Many NHS Mental Health Trusts have adopted functional splits to inpatient and outpatient care, whereby different teams lead care and treatment with an individual at different phases of their illness. However, rather than continue to work in these operational silos, inpatient and outpatient teams need to seamlessly interact with the admitted service user to develop a single narrative and purpose to the admission, while also participating fully in the process of discharge. We believe that there is scope to improve this practice, with the increased efficiency in knowledge sharing leading to timelier, safer and higher quality discharges.

Strategies to reduce hospital admissions and to help mental health service users remain in the community have received the attention of researchers. Studies have explored the efficacy of crisis care planning,<sup>5</sup> recovery planning<sup>6</sup> and the effectiveness of service delivery models such as Assertive Outreach.<sup>7</sup> However, the same cannot be said for the transfer of care from hospital back to home, or from hospital-based to community-based care. Locally, about 10% of patients are readmitted within a month of discharge, although this figure varies between different wards. There is no published national data on readmission rates. Readmission rates act as a proxy measure, albeit a crude one, for failed discharge. There has been no study looking at the factors that are associated with higher readmission rates.

We completed a literature review using search terms: mental health, discharge, adult (aged 18-65 years), acute and inpatient, using the ASSIA, CINAHL, EMBASE, MEDLINE and

1  
2  
3 PSYCHINFO electronic databases. This returned only 139 citations, of which just six full text  
4 empirical papers were obtained. To be included in our review, papers needed to be  
5 published since 2000, so that they explored relatively contemporary healthcare issues and  
6 experiences. Of the papers included, two were from the UK, one each from Australia,  
7 Canada, Germany and the USA. Due to the heterogeneity in the study designs (one  
8 systematic literature review, one qualitative study, one retrospective case note analysis and  
9 four surveys) a narrative approach to the synthesis of the identified literature and the key  
10 areas highlighted were:  
11  
12  
13  
14  
15  
16

- 17 • The handover of information between professionals.<sup>8</sup>
- 18 • Facilitative discharge approaches.<sup>9</sup>
- 19 • The challenges of delayed discharge.<sup>10 11</sup>
- 20 • Discharge planning interventions specifically in relation to outpatient follow-up  
21 appointments.<sup>12</sup>
- 22 • The use of an inpatient keyworker and peer support worker to assist service users  
23 with the transition from hospital to the community.<sup>13</sup>

24  
25  
26  
27  
28  
29  
30  
31  
32 Although these studies have highlighted some interesting findings, the lack of a robust  
33 evidence base indicates a need for further research into the transfer of care process,  
34 particularly as a 'critical period' of post-discharge care (the first seven days) when people  
35 with mental health problems are at increased risk of suicide has been identified.<sup>14</sup> Suicide is  
36 a devastating consequence for the individual, their families and mental health professionals,  
37 but is also relatively rare. In contrast, a range of more frequent and 'mundane' care  
38 problems often arise from care transition planning that impact the costs and quality of life  
39 for people with mental health problems and their carers. Although there is a lack of  
40 evidence exploring these factors, anecdotal reports highlight difficulties such as medication  
41 not being available for service users on their return to the community, community nurses  
42 and social workers not being aware that an individual has been discharged and disruption in  
43 social security benefits leaving services users without an income and being financially  
44 dependent on others. In relation to delayed discharge from hospital, each additional day on  
45 the ward incurs a cost in excess of £400, whilst the Care Services Partnership and the  
46  
47  
48  
49  
50  
51  
52  
53  
54  
55  
56  
57  
58  
59  
60

1  
2  
3 National Institute for Mental Health in England identify the following 'human'  
4 consequences:  
5  
6

- 7 • Stressed, bored and anxious inpatients.
- 8
- 9 • Increased lengths of time other service users wait for therapeutic intervention
- 10 and arrangement of care packages.
- 11
- 12 • Overstretched and insufficient staff.
- 13
- 14 • An increased risk of serious incidents, substance misuse, self-harm, violence and
- 15 aggression on the wards.
- 16
- 17 • Potential delays in admitting appropriate at risk service users or the premature
- 18 discharge of others.
- 19
- 20 • Inappropriate transfer of service users between wards and services.
- 21
- 22 • An increased risk of service user dependence on inpatient care and subsequent
- 23 loss of coping skills post discharge.
- 24
- 25 • The loss of community contacts and supports such as friends, tenancies and
- 26 employment.
- 27
- 28 • A negative impact on staff morale, retention and recruitment.<sup>15</sup>
- 29
- 30
- 31
- 32
- 33

34 Discharge is also often perceived as a one-off event at the end of an admission. Research by  
35 Waring and colleagues shows that discharge planning and the transition of care is located  
36 within complex systems of interacting and inter-dependent actors.<sup>16</sup> Strategies to  
37 coordinate the work of heterogeneous actors and mitigate system complexity are  
38 increasingly recognised within the social science literature,<sup>17</sup> but have not been applied to  
39 the problems of hospital discharge for people with mental health problems. In particular,  
40 the social science literature highlights the importance of knowledge sharing as a basis of  
41 collaboration and coordination.<sup>18-21</sup>  
42  
43  
44  
45  
46  
47

48  
49 Sullivan and Williams suggest that "the health, social care and wellbeing needs of vulnerable  
50 people are complex and interrelated. They require carefully planned, co-ordinated and  
51 delivered interventions from a number of different professional groups working together",<sup>22</sup>  
52 yet healthcare delivery is increasingly categorised by its fragmented, multi-professional  
53  
54  
55  
56  
57  
58  
59  
60

1  
2  
3 teams and partnerships that cross organisational boundaries, and as such, “the provision of  
4 seamless health and social care remains problematic”.<sup>22</sup>  
5  
6

7  
8 A recent audit carried out in the study site has shown that the admission and discharge  
9 process is complex, multi-faceted and involves a significant number of healthcare  
10 practitioners from across a variety of different occupations and agencies. Significantly,  
11 although all these practitioners hold knowledge about the patient’s transition of care, there  
12 is no central knowledge repository where all this information is being collated in a manner  
13 that allows for its readily available access and utility. Rather, information is variously  
14 recorded in different sections of the patient’s notes, where each clinical grouping makes  
15 notes in ‘their’ section, often without cross-referral to other sections. The other main source  
16 of information is personal notes often carried around by the individual practitioner, for  
17 example, those taken during the nursing handover. This has led to an inconsistent  
18 information collection process, where gaps in knowledge about service users have resulted.  
19 Such information deficits have led to practitioners repeatedly collecting the same  
20 information as their colleagues and thus duplicating work. Moreover, the gaps in knowledge  
21 about the patient which need to be addressed in order to plan a safe and effective  
22 discharge, are often not identified in a timely enough manner, and are instead only being  
23 flagged once discharge is imminent. We therefore suggest that the problem is one of  
24 knowledge sharing – and in particular, the breakdown in sharing knowledge and the  
25 resultant gaps in knowledge which appear.  
26  
27  
28  
29  
30  
31  
32  
33  
34  
35  
36  
37  
38  
39

40 Public policies advocate collaborative partnerships to foster more inclusive and ‘joined-up’  
41 service delivery mechanisms.<sup>23</sup> This is largely premised on improved knowledge sharing,  
42 whereby actors are able to communicate information across occupational, organisational  
43 and sectoral boundaries, and meet a mutual set of objectives which should ultimately result  
44 in a more streamlined and integrated way of working.<sup>24</sup> Knowledge sharing can represent a  
45 powerful source of service integration, efficiency and, importantly safety. However, there  
46 are major challenges to this; communication ‘breakdowns’ represent a major barrier to  
47 service efficiency and safety; NHS ‘collaboratives’ and ‘mandated networks’ are bedevilled  
48 by professional cleavages and power differentials that inhibit knowledge sharing.<sup>24 25</sup>  
49  
50  
51  
52  
53  
54  
55  
56  
57  
58  
59  
60

1  
2  
3 There is growing evidence of the social and organisational processes involved in care  
4 transitions, including the importance of communication, yet this rarely takes account of the  
5 complex social and cultural dynamics of knowledge sharing. The literature on knowledge  
6 sharing relates, more broadly, to theories and concepts associated with inter-personal and  
7 occupational communication; knowledge exchange and brokering; translational research;  
8 and organisational learning. This diverse literature shows that various interpersonal, social  
9 and organisational factors influence knowledge sharing and learning within complex  
10 organisations, including the appreciation of distinct knowledge domains, social hierarchy,  
11 accessibility, and psychological safety and trust.<sup>26</sup> Knowledge is shown to be both 'slippery',  
12 where it is too difficult to codify, as well as 'sticky' or difficult to share across cultural or  
13 institutional boundaries.<sup>27 28</sup> Such research also highlights the various strategies for  
14 facilitating knowledge sharing, such as 'knowledge brokers' who can translate and transfer  
15 knowledge between isolated groups, information and communication technology to provide  
16 easy access and retrieval to knowledge and 'communities of practice' that engender cultural  
17 and organisational alignment through knowledge sharing.<sup>29 30</sup>

18  
19  
20  
21  
22  
23  
24  
25  
26  
27  
28  
29  
30  
31 Given the clinical risks associated with hospital discharge, it continues to be a national policy  
32 priority,<sup>31</sup> with the advice that care transitions should be seen as "a process not an isolated  
33 event"<sup>32</sup> involving the active participation of health and social care professionals, as well as  
34 service users and carers, to effectively plan and co-ordinate discharge. This whole system  
35 approach highlights the inter-dependency of individuals and organisations from different  
36 care delivery settings. However, the most common threats to timely and efficient hospital  
37 discharge are associated with notifying and organising 'external services'.<sup>33</sup> This highlights  
38 the importance of communication between care providers, yet the literature on hospital  
39 discharge offers little in way of this, especially in relation to discharge from acute mental  
40 health services. As highlighted previously, our literature review identified only one study  
41 which explicitly explored information and communication provision in relation to discharge  
42 between primary care providers and inpatient services in the USA.<sup>8</sup>

43  
44  
45  
46  
47  
48  
49  
50  
51  
52  
53 It is important to understand the barriers and drivers to a patient's care transition not as  
54 linear casual chains within single or isolated care settings, but as complex and enmeshed  
55 'constellations' of factors found within and between care processes and teams. This  
56  
57  
58  
59  
60



1  
2  
3 includes the deeper 'darksides' of service organisation and delivery,<sup>34</sup> such as organisational  
4 boundaries and the shifting of responsibility and endemic problems of inter-professional  
5 and inter-organisational working, which typically relate to problems in communication or  
6 knowledge sharing.<sup>35</sup> Glasby suggests three prominent factors influence the participation  
7 and co-ordination of these different stakeholders, which are also consistent with the whole  
8 systems and systems thinking approaches.<sup>36</sup> These include: 1) occupational factors, related  
9 to the particular knowledge, culture and practice domains of care providers, such as  
10 doctors, social workers and nurses; 2) organisational factors, related to the routine working  
11 patterns, facilities, capacities and resources of individuals agencies; and 3) compatibility and  
12 co-ordinating factors, related to how occupational, organisational and institutional factors  
13 align, including communication, decision-making and resources.  
14  
15  
16  
17  
18  
19  
20  
21  
22

23  
24 Consequently, in piecing together the jigsaw of contemporary, complex, integrated  
25 healthcare, individual practitioners and healthcare workers must mediate boundaries to  
26 their knowledge sharing, which act to decipher what constitutes the expert and legitimate  
27 participation of particular groups of people in particular circumstances.<sup>37</sup> These boundaries  
28 can be "physical, cognitive, relational, structural, knowledge based or any other delineation  
29 that separates one boundary from another".<sup>38</sup>  
30  
31  
32  
33  
34

35  
36 The resulting gaps have been described as structural holes, fissures and silos;<sup>39</sup> they act to  
37 "shine a light on how communication breaks down, interactivity fails or where teamwork is  
38 weak or floundering. Structural holes are often at the boundaries of organisational silos and  
39 this can enable and impede inter-professional relations or inter-unit knowledge  
40 transmission.<sup>39</sup> Boundaries or silos between different professions and professional practices  
41 have long been recognised (for example, medical tribalism;<sup>22,40</sup> they are known to inhibit  
42 knowledge sharing,<sup>35</sup> to the extent that they are "a significant brake on quality  
43 improvement initiatives".<sup>41</sup>  
44  
45  
46  
47  
48  
49

50  
51 Crossing boundaries and connecting separate work and knowledge domains requires co-  
52 ordination for effective knowledge sharing to occur. Boundary crossing describes the actions  
53 and activities of a person, a group or an intervention that makes "transactions and  
54 interactions" across different sites.<sup>37</sup> Boundary crossing is a "challenge of negotiating and  
55 combining ingredients from different contexts to achieve hybrid solutions",<sup>42</sup> and is a means  
56  
57  
58  
59  
60

1  
2  
3 of acquiring and controlling knowledge.<sup>16</sup> Thus for activities that require linking or brokering  
4 across and between boundaries, there is a need to search for connections in order to  
5 mobilise and share knowledge across the professional territories, and create links to avoid  
6 fragmentation, disconnection and ultimately, to prevent patient need from being left  
7 unaddressed.  
8  
9

10  
11  
12  
13 Swan and Scarborough call for dedicated knowledge brokering roles, arguing that these  
14 enable “the transfer of knowledge across organisational and inter-organisational  
15 boundaries”.<sup>43</sup> Braithwaite et al. develop this line of argument further, referring to the  
16 dissemination of information via “grapevines”,<sup>44</sup> which interweave between individuals who  
17 are linked through a common purpose. Effective and timely communication, for instance,  
18 between hospital and the community mental health team is essential in ensuring  
19 appropriate transition from the hospital into the community. Yet, it is hypothesised that in  
20 the acute in-patient mental health experience, given the complexity and inter-agency  
21 working that occurs, there is no one or nothing carrying out this brokering role across the  
22 boundaries, and being the central information repository resource.  
23  
24  
25  
26  
27  
28  
29  
30

31  
32 In other healthcare sectors, it is possible that the patient would be an ideal candidate to act  
33 as a knowledge broker – as it is the patient that is the constant across the various health  
34 and social care interactions that take place. However, a service user being admitted onto an  
35 acute mental health ward, often without their explicit consent (i.e. they are on a section of  
36 the Mental Health Act), is quite likely to lack the capacity to act in this knowledge broker  
37 role. For example, Owen and colleagues report that up to 80% of service users admitted to  
38 an inpatient ward in London lacked the capacity to make decisions regarding their own  
39 treatment.<sup>45</sup> What’s more, as their care will have been delivered by multiple providers and  
40 agencies, as well as family members and significant others, there is not a central knowledge  
41 repository that can be drawn upon. Rather, information presented upon admission to the  
42 ward can be sketchy and incomplete, with practitioners and administrators searching for  
43 information from multiple sources. This is not just a waste of valuable resources, but also  
44 delays the admission procedure, and in turn, failure to identify complete knowledge about  
45 the patient can delay their treatment and eventual discharge from the ward.  
46  
47  
48  
49  
50  
51  
52  
53  
54  
55  
56  
57  
58  
59  
60

1  
2  
3 We suggest that knowledge sharing between the service user (where possible),  
4 professionals and carers during the admission and discharge planning processes can speed  
5 up the process and reduce the knowledge gaps which are known to create delays and  
6 blockages to discharge. We will focus on one acute mental health admission ward to  
7 investigate how the discharge planning and transition process can be enhanced, in terms of  
8 making discharge more effective through improved knowledge sharing. We will test this  
9 assertion through the development, implementation and utilisation of a knowledge  
10 collection proforma that will be completed by healthcare staff upon the service user's  
11 arrival onto the ward. We do this in anticipation of the implementation of the recently  
12 announced electronic health record, intended to be in practice by 2015, and the vision of a  
13 paperless NHS by 2018.<sup>46</sup> This study is the first step towards the production of a shared  
14 knowledge collection resource, which can be used by all health and social care practitioners  
15 involved in the admission and discharge of patients from an acute mental health ward. If  
16 this is shown to be effective, further funding will be sought to develop and roll out an  
17 electronic version.  
18  
19  
20  
21  
22  
23  
24  
25  
26  
27  
28  
29  
30  
31  
32

### 33 **METHODS AND ANALYSIS**

34  
35  
36 This study follows an improvement science approach. Although a relatively new term, which  
37 is often interchangeably used along with translational science, implementation science,  
38 evidence-based practice, knowledge translation, and research utilisation, the overarching  
39 goal of improvement science is to ensure that quality improvement efforts are evidence  
40 based.<sup>47</sup> Improvement science offers a rigorous yet practical approach to understanding and  
41 implementing quality improvement, as it "inhabits the sphere between research and quality  
42 improvement by applying research methods to help understand what impacts on quality  
43 improvement".<sup>48</sup> As such, it "focuses on systematically and rigorously exploring 'what  
44 works' to improve quality in healthcare and the best ways to measure and disseminate this  
45 to ensure positive change".<sup>48</sup>  
46  
47  
48  
49  
50  
51  
52  
53  
54

55 The study will address the following hypothesis:  
56  
57  
58  
59  
60

1  
2  
3 “Inappropriate discharge and subsequent readmission will be reduced if greater  
4 knowledge is shared, known and utilised to support collaboration during inpatient  
5 admission and discharge planning”.  
6  
7

8  
9 Secondary objectives are:  
10

- 11 1. To explore the knowledge sharing process and procedure upon admission to an adult  
12 acute mental health ward.  
13
- 14 2. To seek to improve knowledge sharing to prevent delayed discharge because of  
15 information gaps.  
16  
17  
18  
19

20 Qualitative data will be collected to understand the complex processes and blockages  
21 involved in knowledge sharing during in a patient’s admission and discharge from the acute  
22 ward. This will enable the research team to produce a knowledge collection proforma,  
23 which will prompt healthcare practitioners to be aware of knowledge gaps in the patient’s  
24 history, and raise questions /take action where this is needed.  
25  
26  
27  
28

29 Using a mixed methods approach, an in-depth understanding of the complex processes  
30 associated with being admitted and discharged from inpatient mental health wards will be  
31 ascertained. Healthcare practitioners’ (acute and community based) perceptions of the  
32 appropriateness of this new knowledge collection tool will be evaluated using qualitative  
33 methods, and will be supplemented by quantitative data analysis, through baseline and  
34 repeat measures of anonymised patient length of stay and readmission rates.  
35  
36  
37  
38  
39  
40  
41

42 Anonymised baseline data collected at the start of the study will be repeated at the  
43 completion of the pilot, to measure any change has occurred in both average length of stay,  
44 and patient readmission rates. Readmission is defined locally as ‘patient readmitted within a  
45 month of initial discharge’. Length of stay and readmission rate measures have been  
46 selected as they are both aligned to a CQUIN target (21 days median length of stay) and are  
47 requested by the local Clinical Commissioning Groups to inform their decision-making.  
48  
49  
50  
51  
52

53 The project is structured across a number work packages. The initial phase of the project  
54 will identify the relevant stakeholders and information sources involved in mental health  
55 admission and discharge. Subsequent work will engage and work with clinicians and  
56  
57  
58  
59  
60

1  
2  
3 healthcare workers to develop the intervention (the knowledge capture proforma) which  
4 will be piloted in the latter phases of the project. Following this we will ask those involved to  
5 reflect on their experiences of using the proforma, so that this can be used to further  
6 develop the intervention and apply for further funds for a larger scale study.  
7  
8  
9

- 10  
11
- 12 • *Work package 1* will see anonymised baseline data taken on the average length of  
13 stay on the study site (Ward A) and readmission rates over the last calendar year.  
14 The study team will carry out a series of qualitative interviews with clinicians and  
15 healthcare practitioners working in acute and community care settings who are  
16 involved in the admission and discharge processes of patients into/out of Ward A.  
17 Additionally, any admission and discharge packs, or other knowledge collation  
18 documents, will be collected and studied, to identify what information is currently  
19 assembled, by whom and when, where it is stored and when it is used.  
20
  - 21 • *Work package 2* will draw on the learning from work package one, and will involve  
22 the production of a new knowledge capture proforma to be used at the time of the  
23 patient's admission onto the acute ward. Following the initial analysis of the data  
24 from work package one, the new proforma will be co-produced with members of the  
25 acute and community teams in a series of workshops. By co-designing the proforma  
26 in this manner – similar to a user-based design approach, it ensures that the resulting  
27 product is fit for use by the practitioners, as they have had a role in co-producing the  
28 outcome.  
29
  - 30 • *Work package 3* will involve the roll-out of the knowledge collection proforma  
31 produced in work package two. Its introduction will be supported by a series of short  
32 presentations made by the study team to members of the care team. The proforma  
33 will be piloted for two calendar months on Ward A.  
34
  - 35 • *Work package 4* will comprise of a series of evaluative qualitative interviews with the  
36 clinicians and practitioners who will have been using the new knowledge capture  
37 proforma. These interviews will collect data on perceptions and experiences of using  
38 the proforma, and whether practitioners feel its implementation and use has  
39 enhanced the admission and discharge process in relation to being able to having  
40 cohesive knowledge about the patient. Repeated baseline measures on anonymised  
41  
42  
43  
44  
45  
46  
47  
48  
49  
50  
51  
52  
53  
54  
55  
56  
57  
58  
59  
60

length of stay and readmission rates will be taken, to cover the pilot dates, in order to provide quantitative evidence of any effect that the form may have had.

The study follows a Plan-Do-Study-Act cycle.

Work packages 1 and 2 fall under the PLAN stage; work package 3 comprises of the DO stage; work package 4 fulfils the STUDY stage, whilst the final ACT stage will be covered in a future funding application, to develop this pilot study further, and to cover its rollout and evaluation across the whole of the NHS Trust involved.

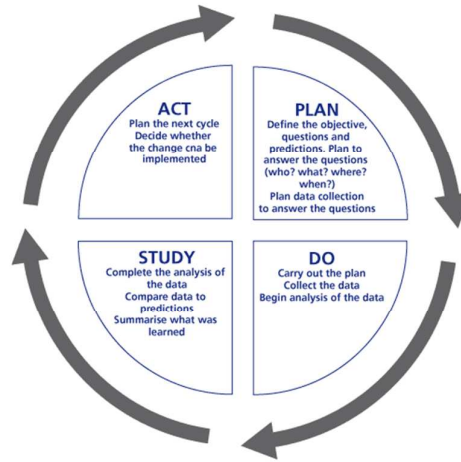

(Image courtesy of NHS Scotland)

<http://uat.qihub.scot.nhs.uk/programmes/improvement-tools/search-results/improvement-tool.aspx?id=66>

### Study configuration

This is a single site study; the predominant focus is on a single acute mental health ward. However, in order to respond to the hypothesis and research objectives, it will also be necessary to include healthcare staff working in community care (employed by the same NHS Trust as the ward based staff) who are involved in the referral and admission/discharge process into / from Ward A.

Ward A is a busy acute mental health ward in an urban setting within the UK. It has 20 beds for male patients. Patients typically have been diagnosed with schizophrenia, bipolar disorder, severe depression or borderline or anti-social personality disorder, often with co-morbid substance misuse problems and sometimes with other physical health problems.

### *Recruitment*

Participants for the study will all be employed by the NHS Trust, and either be working on Ward A or be a member of a community team (e.g. Crisis Teams, Community Assessment and Treatment, Early Intervention in Psychosis, Recovery and Assertive Outreach, CMHTs) which admits service users to the ward or is involved in their care following discharge. No service users or their carers / family members will be recruited to participate in the study at this stage. The initial approach will be from AC, who is a consultant on the ward, and will be made verbally and followed up in writing, accompanied by a participant information sheet and consent form.

### *Sample size and justification*

Sample size is determined by the number of relevant stakeholders working in / into Ward A, rather than by power calculations or expectations about study dropout. The sample size will be approximately 50 healthcare practitioners. This number covers all those healthcare workers who would reasonably be expected to have some interaction with Ward A in relation to the admission or discharge of a patient.

### *Eligibility criteria*

In order to be eligible to be involved in the study, participants should be employed by the NHS Trust and have a role in the admission and/or discharge of patients from Ward A.

Consequently, in order to be eligible to be included in the study, participants should be:

- Aged between 18 and 65 years of age.
- Working in the NHS.
- Able to give consent.
- Involved in the admission and/or discharge of patients from Ward A

Conversely, individuals will be excluded from participating in the study if they are not employed by the NHS Trust; have no experience of admission / discharge of patients into / from Ward A, and are unable to give consent.

1  
2  
3 All participants will provide informed consent before being enrolled in the study.  
4  
5

6 *Data collection*  
7

8  
9 As illustrated in table 1, two sets of qualitative interviews will be held with all health and  
10 social care practitioners who interact with Ward A regarding the admission and discharge of  
11 patients; these are scheduled to take place during work packages one and three. Qualitative  
12 interviews have been chosen as a data collection technique as enable the space for  
13 reflective reporting and open discussion of the phenomena under investigation. To this end,  
14 a topic guide will be utilised (see table 2 for an indicative illustration of the topics that might  
15 be covered). Interviews will be carried out by NW and ER, recorded with participants'  
16 consent, and transcribed verbatim.  
17  
18  
19  
20  
21  
22  
23

24 Work package two involves a series of co-design workshops with the health and social care  
25 practitioners previously interviewed. These workshops will be practical in focus, and will  
26 seek to produce a knowledge capture proforma, that will ensure that knowledge regarding  
27 admission and discharge is shared between the different health and social care  
28 practitioners. Co-design is founded on the principle that “making it “better” is possible if  
29 users are involved in the design process.<sup>49</sup> The approach, while practical, also enables  
30 discussion of “how well people understand [the intervention being designed], how they feel  
31 about it while they are using it, how well it serves its purpose, and how well it fits into the  
32 context in which they are using it”.<sup>49</sup> It is this “knowledge of the experience” in relation to  
33 the problems and potential solutions to knowledge sharing and capture in relation  
34 admission and discharge from the acute mental health ward, that is “unique and  
35 precious”.<sup>49</sup>  
36  
37  
38  
39  
40  
41  
42  
43  
44  
45

46 Marshall and colleagues argue how “improvement science needs a genuine partnership  
47 between academics and front-line practitioners.<sup>50</sup> Researchers bring scepticism, scientific  
48 rigour, and methodological technical expertise, whereas practitioners bring content  
49 knowledge, a thorough understanding of working contexts, and practical wisdom.  
50 Academics and service partners need to collaborate to design, undertake, and interpret the  
51 work of improvement science”. Together, the two approaches of co-design and  
52  
53  
54  
55  
56  
57  
58  
59  
60



1  
2  
3 improvement science offer potential to produce a step change in knowledge sharing, and  
4  
5 reduce the delays to discharge caused by communication failure.  
6  
7  
8  
9  
10  
11  
12  
13  
14  
15  
16  
17  
18  
19  
20  
21  
22  
23  
24  
25  
26  
27  
28  
29  
30  
31  
32  
33  
34  
35  
36  
37  
38  
39  
40  
41  
42  
43  
44  
45  
46  
47  
48  
49  
50  
51  
52  
53  
54  
55  
56  
57  
58  
59  
60

For peer review only

Table 1: Study Regime

|                                                                                                        | Timeline                        | Research team activities                                                                                                                                                   | Participant involvement                                                                                                                                                                                                                                                                       |
|--------------------------------------------------------------------------------------------------------|---------------------------------|----------------------------------------------------------------------------------------------------------------------------------------------------------------------------|-----------------------------------------------------------------------------------------------------------------------------------------------------------------------------------------------------------------------------------------------------------------------------------------------|
| Work package 1:<br>   | Late Autumn 2013 – January 2014 | <ul style="list-style-type: none"> <li>• Baseline data collection</li> <li>• Collection &amp; analysis of admission and discharge documents</li> <li>• Analysis</li> </ul> | <ol style="list-style-type: none"> <li>Participants to be identified (by AC, acting as gatekeeper to the clinical setting)</li> <li>Invitations issued, accompanied by Participant Information Sheet and Consent Form)</li> <li>Interview scheduled</li> <li>Interview takes place</li> </ol> |
| Work package 2:<br> | January – February 2014         | <ul style="list-style-type: none"> <li>• Analysis</li> </ul>                                                                                                               | <ol style="list-style-type: none"> <li>Participants invited to participate in co-production / co-design workshops for knowledge capture tool / proforma</li> <li>Workshops arranged and take place</li> </ol>                                                                                 |
| Work package 3:<br> | March – April 2014              | <ul style="list-style-type: none"> <li>• Roll out of the knowledge capture tool, supported by training presentations</li> </ul>                                            |                                                                                                                                                                                                                                                                                               |

|                                                                                                          |                            |                                                                                                                                |                                                                                                             |
|----------------------------------------------------------------------------------------------------------|----------------------------|--------------------------------------------------------------------------------------------------------------------------------|-------------------------------------------------------------------------------------------------------------|
|                                                                                                          |                            |                                                                                                                                |                                                                                                             |
| <p>Work package 4:</p>  | <p>May – November 2014</p> | <ul style="list-style-type: none"> <li>• Repeat measures</li> <li>• Analysis</li> <li>• Reporting and dissemination</li> </ul> | <p>i. Staff interviews regarding their perceptions and experiences of using the knowledge capture tool.</p> |

Table 2: Interview topic guides

| Topics to be covered in Work package 1 interviews                                                                                                                                                                                                                                                                                                                                                                                                                                                                                                                                                                                                                                                                     | Topics to be covered in Work package 3 interviews                                                                                                                                                                                                                                                                                                                                                                                                                                                                                                                                                                                                                                                                |
|-----------------------------------------------------------------------------------------------------------------------------------------------------------------------------------------------------------------------------------------------------------------------------------------------------------------------------------------------------------------------------------------------------------------------------------------------------------------------------------------------------------------------------------------------------------------------------------------------------------------------------------------------------------------------------------------------------------------------|------------------------------------------------------------------------------------------------------------------------------------------------------------------------------------------------------------------------------------------------------------------------------------------------------------------------------------------------------------------------------------------------------------------------------------------------------------------------------------------------------------------------------------------------------------------------------------------------------------------------------------------------------------------------------------------------------------------|
| <ul style="list-style-type: none"> <li>• Experiences of patient admission process onto Ward A – what is involved, who is involved, how long does it take?</li> <li>• Perceived problems with the patient admission process.</li> <li>• How, when and by whom is knowledge and information is gained, stored and shared?</li> <li>• Experiences of patient discharge process from Ward A – what is involved, who is involved, how long does it take?</li> <li>• Perceived problems with the patient admission process.</li> <li>• How, when and by whom is knowledge and information is gained, stored and shared?</li> <li>• About delays in discharge – how often? Caused by what? What knock-on effects?</li> </ul> | <ul style="list-style-type: none"> <li>• About using the new knowledge capture form</li> <li>• Did knowledge sharing in relation to patient admission process onto Ward A improve whilst the form was being used?</li> <li>• Any problems with the form?</li> <li>• How might it be improved?</li> <li>• Having used the form, how, when and by whom is knowledge and information is gained, stored and shared?</li> <li>• Following using the form, what have been the experiences of patient discharge process from Ward A – what is involved, who is involved, how long does it take?</li> <li>• Have delays in discharge through gaps in knowledge about a patient’s circumstances, been reduced?</li> </ul> |

### Data analysis

The data will be analysed using conventional qualitative methods, and will identify analytical patterns from across individual respondent and wider service.<sup>51 52</sup> Analysis will be inductive, although it will be influenced by the study's theoretical framework of knowledge brokering and knowledge mobilisation.<sup>30 53-55</sup>

Thematic analysis has been chosen as it "provides a concise, coherent, logical, non-repetitive and interesting account of the story the data tell".<sup>56</sup> Although time intensive - it requires the research team to spend time engaging with the data, reading and rereading the interview transcriptions and listening to the audio recordings of interviews – we believe that it offers unparalleled advantages in 'getting to know' your data. In turn, this "generates understanding, insight and familiarity, which are the building blocks of analysis".<sup>56</sup> The research team will start to identify and code (by highlighting) parts or chunks of the data that they deem to be about the same topic, concept or idea. It is likely that many sections of the data will be given multiple codes, implying that the section/extract is about more than one topic, or idea. As codes are developed it is also important to revisit the rest of the data to see if that code also applies to other parts of the data. Initially, the data will be analysed separately by each member of the research team; following initial coding, the research team will hold regular data meetings in which they will work collaboratively on the analysis of the interview materials.

Due to the need for the research team to analyse the data collaboratively, a CAQDAS (Computer Assisted Qualitative Data Analysis) package, NVivo, will be used. This will allow each member of the research team to add their own comments and analysis. The use of NVivo allows for sections of the transcript to be tagged, or highlighted and named with a certain code or label; these programmes do not undertake the analysis of the data for you, but they do allow the electronic data to be coded and searched, for notes to be written to accompany codes and data extracts, for the data to be more easily navigated, and for the accumulating analytical work to be located on a single data corpus. While early reading and immersion in the data can be done using hard copies of the transcripts, once a number of initial codes have been generated, transcripts will be imported into NVivo, with all coding of the data undertaken on the electronic versions of the transcripts from then on.

1  
2  
3 Following this preliminary analysis stage, in which all the data extracts will have been coded  
4 in a general sense, data will again be examined in order to identify the wider themes and  
5 analytical narrative.  
6  
7  
8  
9

## 10 11 12 **ETHICS AND DISSEMINATION** 13

14  
15 Whilst the ethical issues faced in policy-oriented, qualitative research are not of the same  
16 order as those facing research involving invasive clinical interventions, this is not to say that  
17 they can be brushed aside. The ethical and design issues that are of particular importance in  
18 this kind of research relate to the need to recognise the ways in which the social  
19 relationships relating to the phenomena being studied may impact on the research process,  
20 by impeding some participants from fully expressing their views while encouraging others to  
21 do so.  
22  
23  
24  
25  
26  
27

28  
29 A key issue is that participants in this research will be asked to comment frankly on  
30 something which is a core part of their work, as this relates to the actions of other  
31 individuals and organisations involved in knowledge sharing and brokering during the  
32 admission and discharge processes. From the point of view of us as researchers, of good  
33 research practice, and of the participants themselves, it is clearly important that those  
34 involved are as frank as possible, so that we might get a clear picture of the what has helped  
35 and obstructed the knowledge brokering during admission and discharge process in the  
36 particular context of acute mental health. If some respondents are franker than others, we  
37 may get a skewed view, and of the role of different factors and individuals in the process.  
38 This quandary is amplified by the fact that there may well be entrenched power  
39 relationships within the groups of individuals being studied, with certain parties exerting  
40 considerably more influence than others, which may make those less influential parties  
41 more reluctant to be frank. For example, senior consultants are likely to be perceived by  
42 other participants, as more powerful than a healthcare assistant or an occupational  
43 therapist. For this reason, we will carefully manage group dynamics during the co-design  
44 workshops, to ensure that all parties are able to equally and fully participate.  
45  
46  
47  
48  
49  
50  
51  
52  
53  
54  
55  
56  
57  
58  
59  
60

1  
2  
3 When discussing the research with participants at the recruitment stage, we will emphasise  
4 that the views of all involved are equally important, and that we will make every effort to  
5 use what they tell us in a non-attributable way.  
6  
7

8  
9 Service users will be involved at every stage of the planning and management of the study.  
10 We will convene a small group of approximately five members who have had recent  
11 experience of being admitted and discharged from hospital. This group will be facilitated by  
12 a member of the research team and will meet approximately bimonthly. They will discuss  
13 the planning and development of the project and intervention, be involved in data analysis  
14 and disseminate the study findings to service user forums and in service user focused  
15 publications. They will also be invited to be involved in the development of any subsequent  
16 research grant applications and follow on studies should these occur. If any members of the  
17 service user group wish to join the full study management team, they will be enabled to do  
18 this; otherwise their views and work will be relayed to the full team by the individual who  
19 facilitates the group. Service users will be paid a 'disruption' fee to cover their time and  
20 travel costs incurred through being involved in the study  
21  
22  
23  
24  
25  
26  
27  
28  
29  
30

### 31 *Dissemination*

32  
33  
34 Study results will be published and disseminated in a variety of ways. A report of the study  
35 will be produced, including an executive summary which will be distributed to participants  
36 and any other interested party. Peer-reviewed publications in academic outlets will be  
37 pursued, as will outputs in practitioner-oriented publications. Participants will not be  
38 identified in any publications.  
39  
40  
41  
42

43  
44  
45 This study sets out to co-produce a solution to an enduring problem in healthcare practice.  
46 Knowledge sharing amongst different health and social care teams is neither a new  
47 phenomenon nor something that is recognised as easily solved. It is also something that  
48 many researchers before us have attempted to improve. However, our focus on knowledge  
49 sharing upon admission and discharge from an acute mental health ward, informed by  
50 improvement science and co-design approaches, offers a potential solution that is locally  
51 produced and owned. We hope that this approach will offer sustained benefits to patients  
52 and health and social care practitioners.  
53  
54  
55  
56  
57  
58  
59  
60

## ACKNOWLEDGMENTS, COMPETING INTERESTS & FUNDING

**Authors' contributions:** ER led the development of the study protocol and this paper. NW, JW, KG and AC commented on drafts of the protocol and the paper.

**Funding statement:** This work was supported by Nottingham University Business School's 'Spark' research fund.

**Competing interests statement:** AC is the main consultant psychiatrist on the ward where the study will be conducted, and is the problem owner, having identified the issue requiring improvement and bringing it to other members of the research team. KG is a senior nurse on the ward. To maintain objectivity and minimise threats of bias, neither AC nor KG will be involved in data collection and will only have access to anonymised data.

## REFERENCE LIST

1. Care Quality Commission. Board Paper: Thematic reviews – future topics and a proposals for a more systematic approach to topic selection, 2013.
2. Chopra A. Are our mental health services in crisis? *Nottinghamshire Fabian Society*, 2013.
3. Hudson J, Webber M. The National AMHP Survey 2012: Final Report – Stress and the Statutory Role: Is There a Difference Between Professional Groups?, 2012.
4. Health and Social Care Information Centre. Inpatients formally detained in hospitals under the Mental Health Act 1983, and patients subject to supervised community treatment, Annual figures, England, 2011/12, 2013.
5. Thornicroft G, Farrelly S, Szmukler G, et al. Clinical outcomes of Joint Crisis Plans to reduce compulsory treatment for people with psychosis: a randomised controlled trial. *Lancet* 2013;**381**:1634-1641.

- 1  
2  
3 6. Cook JA, Copeland ME, Hamilton MM, et al. Initial outcomes of a mental illness self-  
4 management program based on wellness recovery action planning. *Psychiatr Serv*  
5 2009;**60**:246-249.  
6  
7
- 8  
9  
10 7. Priebe S, Fakhoury W, Watts J, et al. Assertive outreach teams in London: patient  
11 characteristics and outcomes. Pan-London Assertive Outreach Study, part 3. *Br J*  
12 *Psychiatry* 2003;**183**:148-154.  
13
- 14  
15  
16 8. Durbin J, Barnsley J, Finlayson B, et al. Quality of Communication Between Primary Health  
17 Care and Mental Health Care: An Examination of Referral and Discharge Letters. *J*  
18 *Behav Health Serv Res* 2012;**39**:445-461.  
19
- 20  
21  
22 9. Jerpersen S, Chang T, Donegan T, et. al Reflections on facilitated discharge from a mental  
23 health service. *Australas Psychiatry* 2009;**17**:195-201.  
24
- 25  
26  
27 10. Impey M, Milner E. Delayed discharge from mental health inpatient care in the UK  
28 *Mental Health Practice* 2013;**16**:31-35.  
29
- 30  
31  
32 11. Lewis R, Glasby J. Delayed discharge from mental health hospitals: results of an English  
33 postal survey. *Health Soc Care Community* 2006;**14**:225-30.  
34
- 35  
36  
37 12. Steffen S, Kusters M, Becker T, et al. Discharge planning in mental health care: a  
38 systematic review of the literature. *Acta Psychiatr Scand* 2009;**120**:1-9.  
39
- 40  
41  
42 13. Martin ML, Jensen E, Coatsworth-Puspoky R, et al. Integrating an evidence based  
43 research intervention in the discharge of mental health clients. *Arch Psychiatr Nurs*  
44 2007;**21**:101-111.  
45
- 46  
47  
48 14. Meehan J, Kapur N, Hunt IM et al. Suicide in mental health in-patients and within 3  
49 months of discharge. National clinical survey. *Br J Psychiatry* 2006;**188**:129-134.  
50
- 51  
52  
53 15. Care Services Improvement Partnership. A positive outlook: a good practice toolkit to  
54 improve discharge from inpatient mental health care, National Institute of Mental  
55 Health in England, 2007.  
56  
57  
58  
59  
60



- 1  
2  
3 16. Waring J, Currie G, Crompton A, et al. An exploratory study of knowledge brokering in  
4 hospital settings: Facilitating knowledge sharing and learning for patient safety? *Soc*  
5 *Sci Med* 2013;**98**:79-86.  
6  
7  
8  
9  
10 17. Perrow C, Wilensky HL, Reiss AJ. *Complex organizations: A critical essay*: McGraw-Hill  
11 New York, 1986.  
12  
13  
14 18. Parent R, Roy M, St-Jeacques D. A systems-based dynamic knowledge transfer capacity  
15 model. *Journal of Knowledge Management* 2007;**11**:81-93.  
16  
17  
18  
19 19. Jensen CB. Sociology, systems and (patient) safety: knowledge translations in healthcare  
20 policy. *Sociol Health Illn* 2008;**30**:309-324.  
21  
22  
23  
24 20. Ward V, Smith S, House A, et al. Exploring knowledge exchange: A useful framework for  
25 practice and policy. *Soc. Sci. Med.* 2012;**74**:297-304.  
26  
27  
28  
29 21. Wilkinson H, Gallagher M, Smith M. A collaborative approach to defining the usefulness  
30 of impact: lessons from a knowledge exchange project involving academics and  
31 social work practitioners. *Evid Policy* 2012;**8**:311-27.  
32  
33  
34  
35 22. Sullivan H, Williams P. Emerald Article: Whose kettle?: Exploring the role of objects in  
36 managing and mediating the boundaries of integration in health and social care.  
37 *Journal of Health Organization and Management* 2012;**26**:697-712.  
38  
39  
40  
41 23. Klijn EH, Teisman GR. Institutional and Strategic Barriers to Public—Private Partnership:  
42 An Analysis of Dutch Cases. *Public Money and Management* 2003;**23**:137-146.  
43  
44  
45  
46 24. Bate SP, Robert G. Knowledge Management and communities of practice in the private  
47 sector: lessons for modernising the National Health Service in England and Wales.  
48 *Public Administration* 2002;**80**:643-63.  
49  
50  
51  
52 25. Addicott R, McGivern G, Ferlie E. Networks, Organizational Learning and Knowledge  
53 Management: NHS Cancer Networks. *Public Money and Management* 2006;**26**:87-  
54 94.  
55  
56  
57  
58  
59  
60

- 1  
2  
3 26. Cross R, Borgatti SP. The ties that share: Relational characteristics that facilitate  
4 information seeking, Huysman MH, Wulf V (eds). *Social Capital and Information*  
5 *Technology* MIT Press: Cambridge 2004:137-161.  
6  
7  
8  
9  
10 27. Chumer M, Willmott H. *Managing Knowledge: Critical Investigations of Work and*  
11 *Learning*: New York, 2000.  
12  
13  
14 28. Swan J, Scarborough H. Explaining the diffusion of knowledge management: The role of  
15 fashion. *British Journal of Management* 2001;**12**:3-12.  
16  
17  
18  
19 29. Lave J. Situating learning in communities of practice. In: Resnick L, Levine J, Teasley S,  
20 (eds). *Perspectives on Socially Shared Cognition*. Washington, DC, US: American  
21 Psychological Association, 1991.  
22  
23  
24  
25 30. Lomas J. The in-between world of knowledge brokering. *BMJ* 2007;**334**:129-32.  
26  
27  
28  
29 31. Audit Commission. *The way to go home; rehabilitation and remedial services for older*  
30 *people*. London, 2000.  
31  
32  
33 32. Department of Health. *Discharge from Hospital: Pathway, Process and Practice*. London:  
34 The Stationary Office, 2003.  
35  
36  
37 33. National Patient Safety Agency. *National Reporting and Learning System Quarterly Data*  
38 *Summary - England, Issue 13*. London: NPSA, 2009.  
39  
40  
41  
42 34. Vaughan D. The Dark Side of Organizations: Mistake, Misconduct and Disaster. *Annu.*  
43 *Rev. Sociol.* 1999;**25**:271-305.  
44  
45  
46  
47 35. Currie G, Waring J, Finn R. The limits of knowledge management for UK public services  
48 modernization: the case of patient safety and service quality. *Public Administration*  
49 2008;**86**:363-385.  
50  
51  
52  
53 36. Glasby J. *Hospital Discharge: Integrating Health and Social Care*: Radcliffe Publishing,  
54 2003.  
55  
56  
57  
58  
59  
60

- 1  
2  
3 37. Akkerman SF, Bakker A. Boundary Crossing and Boundary Objects. *Rev Educ Res*  
4 2011;**81**:132-169.  
5  
6  
7  
8 38. Chreim S, Langley A, Comeau-Vallee M, et al. Leadership as boundary work in healthcare  
9 teams. *Leadership* 2013;**9**:201-228.  
10  
11  
12 39. Braithwaite J. Between-group behaviour in health care: gaps, edges, boundaries,  
13 disconnections, weak ties, spaces and holes. A systematic review. *BMC Health Serv*  
14 *Res* 2010;**10**:1-11.  
15  
16  
17  
18 40. Long JC, Cunningham FC, Braithwaite J. Bridges, brokers and boundary spanners in  
19 collaborative networks: a systematic review. *BMC Health Serv Res* 2013;**13**:1-13.  
20  
21  
22  
23 41. Powell AE, Davies HTO. The struggle to improve patient care in the face of professional  
24 boundaries. *Soc Sci Med* 2012;**75**:807-814.  
25  
26  
27  
28 42. Engeström Y, Engeström R, Kärkkäinen M. Polycontextuality and boundary crossing in  
29 expert cognition: Learning and problem solving in complex work activities. *Learning*  
30 *and Instruction* 1995;**5**:319-336.  
31  
32  
33  
34 43. Swan J, Scarborough H. The politics of networked innovation. *Human Relations*  
35 2005;**58**:913-942.  
36  
37  
38  
39 44. Braithwaite J, Runciman WB, Merry AF. Towards safer, better healthcare: harnessing the  
40 natural properties of complex sociotechnical systems. *BMJ Qual Saf* 2009;**18**:37-41.  
41  
42  
43  
44 45. Owen GS, Richardson G, David AS, et al. Mental capacity to make decisions on treatment  
45 in people admitted to psychiatric hospitals: cross sectional study. *BMJ*  
46 2008;**337**:a448.  
47  
48  
49  
50 46. Health and Social Care Information Centre. Standards for the clinical structure and  
51 content of patient records, 2013.  
52  
53  
54  
55 47. Shojania KG, Grimshaw JM. Evidence-based quality improvement: the state of the  
56 science. *Health Affairs* 2005;**24**:138-50.  
57  
58  
59  
60

- 1  
2  
3 48. The Health Foundation. Improvement Science: research scan. London: The Health  
4 Foundation, 2011.  
5  
6  
7  
8 49. Bate P, Robert G. Experience-based design: from redesigning the system around the  
9 patient to co-designing services with the patient. *BMJ Qual Saf* 2006;**15**:307-310.  
10  
11  
12 50. Marshall M, Pronovost P, Dixon-Woods M. Promotion of improvement as a science.  
13 *Lancet* 2013;**381**:419-421.  
14  
15  
16  
17 51. Ritchie J, Spencer L. Qualitative data analysis for applied policy research, in Bryman A,  
18 Burgess RG. (eds.) *Analyzing qualitative data*, Routledge, London. 1994, 173-194.  
19  
20  
21  
22 52. Huberman A, Miles M. Data Management and Analysis Methods in: Denzin NK, Lincoln  
23 YS (eds.) *Collecting and Interpreting Qualitative Materials*: Sage Publications,  
24 Thousand Oaks, 1998.  
25  
26  
27  
28 53. Carlile PR. A Pragmatic View of Knowledge and Boundaries: Boundary Objects in New  
29 Product Development. *Organization Science* 2002;**13**:442-445.  
30  
31  
32  
33 54. Davies HTO, Nutley SM, Walter I. Why 'knowledge transfer' is misconceived for applied  
34 social research. *J Health Serv Res Policy* 2008;**13**:188-190.  
35  
36  
37  
38 55. Tetroe J, Graham ID. How to Translate Health Research Knowledge into Effective  
39 Healthcare Action. *Healthc Q* 2007;**10**:20-22.  
40  
41  
42 56. Rowley E. Protocol for a qualitative study exploring the roles of 'Diffusion Fellows' in  
43 bridging the research to practice gap in the Nottinghamshire, Derbyshire and  
44 Lincolnshire Collaboration for Leadership in Applied Health Research and Care  
45 (CLAHRC-NDL). *BMJ Open* 2012;**2**:1-7.  
46  
47  
48  
49  
50  
51  
52  
53  
54  
55  
56  
57  
58  
59  
60

# BMJ Open

## Protocol for an exploration of knowledge sharing for improved discharge from a mental health ward

|                                 |                                                                                                                                                                                                                                                                                                                                                                                                                                                                                                                        |
|---------------------------------|------------------------------------------------------------------------------------------------------------------------------------------------------------------------------------------------------------------------------------------------------------------------------------------------------------------------------------------------------------------------------------------------------------------------------------------------------------------------------------------------------------------------|
| Journal:                        | <i>BMJ Open</i>                                                                                                                                                                                                                                                                                                                                                                                                                                                                                                        |
| Manuscript ID:                  | bmjopen-2014-005176.R1                                                                                                                                                                                                                                                                                                                                                                                                                                                                                                 |
| Article Type:                   | Protocol                                                                                                                                                                                                                                                                                                                                                                                                                                                                                                               |
| Date Submitted by the Author:   | 21-Aug-2014                                                                                                                                                                                                                                                                                                                                                                                                                                                                                                            |
| Complete List of Authors:       | Rowley, Emma; University of Nottingham, Centre for Health Innovation, Leadership & Learning / Nottingham University Business School<br>Wright, Nicola; University of Nottingham, School of Health Sciences<br>Waring, Justin; University of Nottingham, Centre for Health Innovation, Leadership & Learning / Nottingham University Business School<br>Gregoriou, Kyri; Nottinghamshire Healthcare Trust, Adult Mental Health Services<br>Chopra, Arun; Nottinghamshire Healthcare Trust, Adult Mental Health Services |
| <b>Primary Subject Heading</b>: | Mental health                                                                                                                                                                                                                                                                                                                                                                                                                                                                                                          |
| Secondary Subject Heading:      | Health services research                                                                                                                                                                                                                                                                                                                                                                                                                                                                                               |
| Keywords:                       | MENTAL HEALTH, Knowledge Sharing, Patient Admission, Patient discharge, Improvement Science                                                                                                                                                                                                                                                                                                                                                                                                                            |
|                                 |                                                                                                                                                                                                                                                                                                                                                                                                                                                                                                                        |

SCHOLARONE™  
Manuscripts

Only

**Title:**

Protocol for an exploration of knowledge sharing for improved discharge from a mental health ward.

**Corresponding author:**

Emma Rowley, Centre for Health Innovation, Leadership & Learning, Nottingham University Business School, c/o Institute of Mental Health, University of Nottingham Innovation Park, Triumph Road, Nottingham, NG7 2TU. Email: [emma.rowley@nottingham.ac.uk](mailto:emma.rowley@nottingham.ac.uk). Telephone: 0115 82 31313.

**Co-authors:**

Nicola Wright, School of Health Sciences, University of Nottingham, UK.

Justin Waring, Centre for Health Innovation, Leadership & Learning, Nottingham University Business School, Nottingham, UK.

Kyri Gregoriou, Adult Mental Health, Nottinghamshire Healthcare NHS Trust, Nottingham, UK.

Arun Chopra, Adult Mental Health, Nottinghamshire Healthcare NHS Trust, Nottingham, UK.

**MeSH terms:**

Mental health, knowledge sharing, patient admission, patient discharge, improvement science.

**Word count:**

6299

## ABSTRACT

**Introduction:** Strategies to reduce hospital admissions for mental health service users have received vast amounts of attention, yet the transfer of care from hospital to the community has been ignored. The discharge process is complex, messy, disjointed and inefficient, relying on cross agency and organisational working. Focusing on one acute mental health admission ward, we will investigate whether the discharge process for people with severe mental health problems can be enhanced, through the creation, implementation and utilisation of a knowledge sharing proforma which is used upon their admission to the ward.

**Methods & analysis:** The project uses qualitative interviews to understand the complex processes associated with being admitted and discharged from inpatient mental health wards. Practitioners will be asked to identify and map the relevant stakeholders involved in admission and discharge, and discuss any problems with the process. The study team will work with clinicians to develop a knowledge collection proforma, which will be piloted for 2 months. Qualitative interviews will be carried out to collect reflections on the experiences of using the tool, with data used for further refinement of the intervention. Baseline and repeat quantitative measures will be taken to illustrate any changes to length of stay and readmission rates achieved as a result of the study.

**Ethics & dissemination:** A key issue is that participants are able to comment frankly on something which is a core part of their work, without fear or reprisal. It is equally important that all participants are offered the opportunity to develop and co-produce the knowledge collection proforma, in order that the intervention produced is fit for purpose and usable in the real world, away from a research environment. The study has received ethical approval from Nottingham University Business School ethics committee, and has all appropriate NHS research governance clearances.

### Strengths and limitations of this study

Strengths:

- Applied health research – takes complex social theory ideas and applies them to an area of healthcare that is often ignored (mental health)
- Study and intervention is co-produced with end-users

1  
2  
3  
4  
5  
6  
7  
8  
9  
10  
11  
12  
13  
14  
15  
16  
17  
18  
19  
20  
21  
22  
23  
24  
25  
26  
27  
28  
29  
30  
31  
32  
33  
34  
35  
36  
37  
38  
39  
40  
41  
42  
43  
44  
45  
46  
47  
48  
49  
50  
51  
52  
53  
54  
55  
56  
57  
58  
59  
60

Limitations:

- Exploratory study – data collection on only one ward
- Quantitative measures likely to influenced by complex healthcare context

For peer review only



## INTRODUCTION

The Care Quality Commission, the UK's healthcare regulator, has recently suggested that the lack of psychiatric inpatient beds is causing stress to services and patients.<sup>1</sup> At the same time, there is growing evidence that Approved Mental Health Professionals are detaining people under a section, illegally, in order to obtain a bed (Hudson and Webber 2012, Chopra 2013).<sup>2,3</sup>

In the UK, 10% of psychiatric beds (1,700 beds) have been cut since 2011.<sup>4</sup> Conversely, the numbers of people detained under the Mental Health Act reached a record high in 2011/12 with 48,600 people being detained, a 5% rise on 2010/11 levels.<sup>4</sup>

Many NHS Mental Health Trusts have adopted functional splits to inpatient and outpatient care, whereby different teams lead care and treatment with an individual at different phases of their illness. However, rather than continue to work in these operational silos, inpatient and outpatient teams need to seamlessly interact with the admitted service user to develop a single narrative and purpose to the admission, while also participating fully in the process of discharge. We believe that there is scope to improve this practice, with the increased efficiency in knowledge sharing leading to timelier, safer and higher quality discharges.

Strategies to reduce hospital admissions and to help mental health service users remain in the community have received the attention of researchers. Studies have explored the efficacy of crisis care planning,<sup>5</sup> recovery planning<sup>6</sup> and the effectiveness of service delivery models such as Assertive Outreach.<sup>7</sup> However, the same cannot be said for the transfer of care from hospital back to home, or from hospital-based to community-based care. In the East Midlands (UK), about 10% of patients are readmitted within a month of discharge, although this figure varies between different wards. There is no published national data on readmission rates. Readmission rates act as a proxy measure, albeit a crude one, for failed discharge. There has been no study looking at the factors that are associated with higher readmission rates.

1  
2  
3 We completed a literature review using search terms: mental health, discharge, adult (aged  
4 18-65 years), acute and inpatient, using the ASSIA, CINAHL, EMBASE, MEDLINE and  
5 PSYCHINFO electronic databases. This returned only 139 citations, of which just six full text  
6 empirical papers were obtained. To be included in our review, papers needed to be  
7 published since 2000. This was justified on the basis that studies needed to be relevant to  
8 current mental healthcare provision. In total, 139 citations were returned, and following the  
9 removal of duplicates, non-empirical literature and studies not conducted within mental  
10 health services, six full-text papers were obtained.

11  
12 Of the papers included, two were from the UK, one each from Australia, Canada, Germany  
13 and the USA. Due to the heterogeneity in the study designs (one systematic literature  
14 review, one qualitative study, one retrospective case note analysis and four surveys) a  
15 narrative approach to the synthesis of the identified literature was adopted and the key  
16 areas highlighted were:

- 17 • The handover of information between professionals.<sup>8</sup>
- 18 • Facilitative discharge approaches.<sup>9</sup>
- 19 • The challenges of delayed discharge.<sup>10 11</sup>
- 20 • Discharge planning interventions specifically in relation to outpatient follow-up  
21 appointments.<sup>12</sup>
- 22 • The use of an inpatient keyworker and peer support worker to assist service users  
23 with the transition from hospital to the community.<sup>13</sup>

24  
25 Despite the different methods employed, these studies have highlighted some useful  
26 findings. Regardless of the service and organizational variations across the different  
27 countries these papers originated from, the problems and difficulties encountered in  
28 sharing information between professionals working in inpatient and community settings  
29 was consistent. For example, Durbin *et al.*<sup>8</sup> describe the quality of information sharing and  
30 reporting between primary care and mental health services that takes place at referral and  
31 post discharge as, at best, variable. However, the use of interventions, such as liaison  
32 services<sup>12</sup> and specific workers to assist service users with the transition from hospital to  
33 community, were found to produce improvements<sup>8 9 12</sup> and therefore demonstrate that this  
34 process is amenable to intervention. The issue of 'delayed discharge' at an organizational  
35  
36  
37  
38  
39  
40  
41  
42  
43  
44  
45  
46  
47  
48  
49  
50  
51  
52  
53  
54  
55  
56  
57  
58  
59  
60

1  
2  
3 level was explored by the two UK based studies<sup>10 11</sup>. Although they both highlight that there  
4 are differences in the reporting and definition of 'delayed discharges' across the UK, delayed  
5 discharges remain a concern with potential financial ramifications. Lewis and Glasby<sup>11</sup>  
6 suggest that organisations are desperate to tackle delayed discharges by any means  
7 possible. This includes supporting policy directives, such as reimbursement, when in other  
8 circumstances they would not do so.  
9

10  
11  
12  
13  
14 Although these studies have highlighted some interesting findings, the lack of a robust  
15 evidence base indicates a need for further research into the transfer of care process,  
16 particularly as a 'critical period' of post-discharge care (the first seven days) when people  
17 with mental health problems are at increased risk of suicide has been identified.<sup>14</sup> Suicide is  
18 a devastating consequence for the individual, their families and mental health professionals,  
19 but is also relatively rare. In contrast, a range of more frequent and 'mundane' care  
20 problems often arise from care transition planning that impact the costs and quality of life  
21 for people with mental health problems and their carers. Although there is a lack of  
22 evidence exploring these problems, anecdotal reports highlight difficulties such as  
23 medication not being available for service users on their return to the community,  
24 community nurses and social workers not being aware that an individual has been  
25 discharged and disruption in social security benefits leaving services users without an  
26 income and being financially dependent on others. In relation to delayed discharge from  
27 hospital, each additional day on the ward incurs a cost in excess of £340<sup>15</sup>, whilst the Care  
28 Services Partnership and the National Institute for Mental Health in England identify the  
29 following 'human' consequences:  
30  
31  
32  
33  
34  
35  
36  
37  
38  
39  
40  
41  
42  
43

- 44 • Stressed, bored and anxious inpatients.
- 45 • Increased lengths of time other service users wait for therapeutic intervention  
46 and arrangement of care packages.
- 47 • Overstretched and insufficient staff.
- 48 • An increased risk of serious incidents, substance misuse, self-harm, violence and  
49 aggression on the wards.
- 50 • Potential delays in admitting appropriate at risk service users or the premature  
51 discharge of others.
- 52
- 53
- 54
- 55
- 56
- 57
- 58
- 59
- 60

- Inappropriate transfer of service users between wards and services.
- An increased risk of service user dependence on inpatient care and subsequent loss of coping skills post discharge.
- The loss of community contacts and supports such as friends, tenancies and employment.
- A negative impact on staff morale, retention and recruitment.<sup>16</sup>

Research by Waring and colleagues shows that discharge planning and the transition of care is located within complex systems of interacting and inter-dependent actors.<sup>17</sup> Strategies to coordinate the work of heterogeneous actors and mitigate system complexity are increasingly recognised within the social science literature,<sup>18</sup> but have not been applied to the problems of hospital discharge for people with mental health problems. In particular, the social science literature highlights the importance of knowledge sharing as a basis of collaboration and coordination.<sup>19-22</sup>

Sullivan and Williams suggest that “the health, social care and wellbeing needs of vulnerable people are complex and interrelated. They require carefully planned, co-ordinated and delivered interventions from a number of different professional groups working together”,<sup>23</sup> yet healthcare delivery is increasingly categorised by its fragmented, multi-professional teams and partnerships that cross organisational boundaries, and as such, “the provision of seamless health and social care remains problematic”.<sup>23</sup>

A recent (unpublished) audit in the NHS Trust where this research is to take place has shown that the admission and discharge process is complex, multi-faceted and involves a significant number of healthcare practitioners from across a variety of different occupations and agencies. Significantly, although all these practitioners hold knowledge about the patient’s transition of care, there is no central knowledge repository where all this information is being collated in a manner that allows for its readily available access and utility. Although the Trust has recently introduced electronic patient records, the number of computers on the ward is limited, which means timely and immediate access to records (as well as updating them) can be problematic. This results in information being variously recorded in different sections of the patient’s notes, where each clinical grouping makes

1  
2  
3 notes in 'their' section, often without cross-referral to other sections. This information is  
4 then later transposed onto the electronic health record, often by ward administrative staff.  
5  
6

7  
8 A further consequence of the difficulty in accessing electronic health records in a timely  
9 manner is that apart from the paper-based patient files, the other main source of  
10 information collected and used are personal notes often carried around by the individual  
11 practitioner, for example, those taken during the nursing handover or when taking a  
12 telephone call about an incoming patient admission. This has led to an inconsistent  
13 information collection process, where gaps in knowledge about service users have resulted.  
14 Such information deficits have led to practitioners repeatedly collecting the same  
15 information as their colleagues and thus duplicating work. Moreover, the gaps in knowledge  
16 about the patient which need to be addressed in order to plan a safe and effective  
17 discharge, are often not identified in a timely enough manner, and are instead only being  
18 flagged once discharge is imminent. We therefore suggest that the problem is one of  
19 knowledge sharing – and in particular, the breakdown in sharing knowledge and the  
20 resultant gaps in knowledge which appear.  
21  
22  
23  
24  
25  
26  
27  
28  
29  
30

31  
32 Public policies advocate collaborative partnerships to foster more inclusive and 'joined-up'  
33 service delivery mechanisms.<sup>24</sup> This is largely premised on improved knowledge sharing,  
34 whereby actors are able to communicate information across occupational, organisational  
35 and sectoral boundaries, and meet a mutual set of objectives which should ultimately result  
36 in a more streamlined and integrated way of working.<sup>25</sup> Knowledge sharing can represent a  
37 powerful source of service integration, efficiency and, importantly safety. However, there  
38 are major challenges to this; communication 'breakdowns' represent a major barrier to  
39 service efficiency and safety; NHS 'collaboratives' and 'mandated networks' are bedevilled  
40 by professional cleavages and power differentials that inhibit knowledge sharing.<sup>25 26</sup>  
41  
42  
43  
44  
45  
46  
47

48  
49 There is growing evidence of the social and organisational processes involved in care  
50 transitions, including the importance of communication, yet this rarely takes account of the  
51 complex social and cultural dynamics of knowledge sharing. The literature on knowledge  
52 sharing relates, more broadly, to theories and concepts associated with inter-personal and  
53 occupational communication; knowledge exchange and brokering; translational research;  
54 and organisational learning. This diverse literature shows that various interpersonal, social  
55  
56  
57  
58  
59  
60

1  
2  
3 and organisational factors influence knowledge sharing and learning within complex  
4 organisations, including the appreciation of distinct knowledge domains, social hierarchy,  
5 accessibility, and psychological safety and trust.<sup>27</sup> Knowledge is shown to be both 'slippery',  
6 where it is too difficult to codify, as well as 'sticky' or difficult to share across cultural or  
7 institutional boundaries.<sup>28 29</sup> Such research also highlights the various strategies for  
8 facilitating knowledge sharing, such as 'knowledge brokers' who can translate and transfer  
9 knowledge between isolated groups, information and communication technology to provide  
10 easy access and retrieval to knowledge and 'communities of practice' that engender cultural  
11 and organisational alignment through knowledge sharing.<sup>30 31</sup>

12  
13  
14  
15  
16  
17  
18  
19  
20 Given the clinical risks associated with hospital discharge, it continues to be a national policy  
21 priority,<sup>32</sup> with the advice that care transitions should be seen as "a process not an isolated  
22 event"<sup>33</sup> involving the active participation of health and social care professionals, as well as  
23 service users and carers, to effectively plan and co-ordinate discharge. This whole system  
24 approach highlights the inter-dependency of individuals and organisations from different  
25 care delivery settings. However, the most common threats to timely and efficient hospital  
26 discharge are associated with notifying and organising 'external services'.<sup>34</sup> This highlights  
27 the importance of communication between care providers, yet the literature on hospital  
28 discharge offers little in way of this, especially in relation to discharge from acute mental  
29 health services. As highlighted previously, our literature review identified only one study  
30 which explicitly explored information and communication provision in relation to discharge  
31 between primary care providers and inpatient services in the USA.<sup>8</sup>

32  
33  
34  
35  
36  
37  
38  
39  
40  
41  
42  
43 It is important to understand the barriers and drivers to a patient's care transition not as  
44 linear casual chains within single or isolated care settings, but as complex and enmeshed  
45 'constellations' of factors found within and between care processes and teams. This  
46 includes the deeper 'darksides' of service organisation and delivery,<sup>35</sup> such as organisational  
47 boundaries and the shifting of responsibility and endemic problems of inter-professional  
48 and inter-organisational working, which typically relate to problems in communication or  
49 knowledge sharing.<sup>36</sup> Glasby suggests three prominent factors influence the participation  
50 and co-ordination of these different stakeholders, which are also consistent with the whole  
51 systems and systems thinking approaches.<sup>37</sup> These include: 1) occupational factors, related  
52  
53  
54  
55  
56  
57  
58  
59  
60

1  
2  
3 to the particular knowledge, culture and practice domains of care providers, such as  
4 doctors, social workers and nurses; 2) organisational factors, related to the routine working  
5 patterns, facilities, capacities and resources of individuals agencies; and 3) compatibility and  
6 co-ordinating factors, related to how occupational, organisational and institutional factors  
7 align, including communication, decision-making and resources.  
8  
9  
10

11  
12  
13 Consequently, in piecing together the jigsaw of contemporary, complex, integrated  
14 healthcare, individual practitioners and healthcare workers must mediate boundaries to  
15 their knowledge sharing, which act to decipher what constitutes the expert and legitimate  
16 participation of particular groups of people in particular circumstances.<sup>38</sup> These boundaries  
17 can be “physical, cognitive, relational, structural, knowledge based or any other delineation  
18 that separates one boundary from another”.<sup>39</sup>  
19  
20  
21  
22  
23

24  
25 The resulting gaps have been described as structural holes, fissures and silos;<sup>40</sup> they act to  
26 “shine a light on how communication breaks down, interactivity fails or where teamwork is  
27 weak or floundering. Structural holes are often at the boundaries of organisational silos and  
28 this can enable and impede inter-professional relations or inter-unit knowledge  
29 transmission.<sup>40</sup> Boundaries or silos between different professions and professional practices  
30 have long been recognised (for example, medical tribalism;<sup>23 41</sup> they are known to inhibit  
31 knowledge sharing,<sup>36</sup> to the extent that they are “a significant brake on quality  
32 improvement initiatives”.<sup>42</sup>  
33  
34  
35  
36  
37  
38  
39

40  
41 Crossing boundaries and connecting separate work and knowledge domains requires co-  
42 ordination for effective knowledge sharing to occur. Boundary crossing describes the actions  
43 and activities of a person, a group or an intervention that makes “transactions and  
44 interactions” across different sites.<sup>38</sup> Boundary crossing is a “challenge of negotiating and  
45 combining ingredients from different contexts to achieve hybrid solutions”,<sup>43</sup> and is a means  
46 of acquiring and controlling knowledge.<sup>17</sup> Thus for activities that require linking or brokering  
47 across and between boundaries, there is a need to search for connections in order to  
48 mobilise and share knowledge across the professional territories, and create links to avoid  
49 fragmentation, disconnection and ultimately, to prevent patient need from being left  
50 unaddressed.  
51  
52  
53  
54  
55  
56  
57  
58  
59  
60

1  
2  
3 Swan and Scarborough call for dedicated knowledge brokering roles, arguing that these  
4 enable “the transfer of knowledge across organisational and inter-organisational  
5 boundaries”.<sup>44</sup> Braithwaite et al. develop this line of argument further, referring to the  
6 dissemination of information via “grapevines”,<sup>45</sup> which interweave between individuals who  
7 are linked through a common purpose. Effective and timely communication, for instance,  
8 between hospital and the community mental health team is essential in ensuring  
9 appropriate transition from the hospital into the community. Yet, it is hypothesised that in  
10 the acute in-patient mental health experience, given the complexity and inter-agency  
11 working that occurs, there is no one or nothing carrying out this brokering role across the  
12 boundaries, and being the central information repository resource.

13  
14  
15  
16  
17  
18  
19  
20  
21  
22 In other healthcare sectors, it is possible that the patient would be an ideal candidate to act  
23 as a knowledge broker and facilitate the sharing of knowledge and information about their  
24 care requirements and medical history to different practitioners – as it is the patient that is  
25 the constant across the various health and social care interactions that take place. However,  
26 a service user being admitted onto an acute mental health ward, often without their explicit  
27 consent (i.e. they are on a section of the Mental Health Act), is quite likely to lack the  
28 capacity and ability to act in this knowledge broker role at the moment of their admission  
29 onto the ward. What’s more, as their care will have been delivered by multiple providers  
30 and agencies, as well as family members and significant others, there is not a central  
31 knowledge repository that can be drawn upon. Rather, information presented upon  
32 admission to the ward can be sketchy and incomplete, with practitioners and administrators  
33 searching for information from multiple sources. This is not just a waste of valuable  
34 resources, but also delays the admission procedure, and in turn, failure to identify complete  
35 knowledge about the patient can delay their treatment and eventual discharge from the  
36 ward.

37  
38  
39  
40  
41  
42  
43  
44  
45  
46  
47  
48  
49 We suggest that knowledge sharing between the service user (where possible),  
50 professionals and carers during the admission and discharge planning processes can speed  
51 up the process and reduce the knowledge gaps which are known to create delays and  
52 blockages to discharge. We will focus on one acute mental health admission ward to  
53 investigate how the discharge planning and transition process can be enhanced, in terms of  
54  
55  
56  
57  
58  
59  
60



1  
2  
3 making discharge more effective through improved knowledge sharing. Knowledge sharing  
4 requires collaboration and co-ordination in order to be effective<sup>19-22</sup>, as planned rather than  
5 ad-hoc actions are required in order to address the difficulties in information sharing in  
6 fragmented care settings<sup>23</sup>. As we have already described, staff on the ward are known to  
7 keep 'personal notes' containing information about a patient. Through the development,  
8 implementation and utilisation of a knowledge collection proforma that will be completed  
9 by healthcare staff upon the service user's arrival onto the ward, we will seek to formalise  
10 these personal notes, so that they are stored in a patient's (paper-based) notes folder rather  
11 than remain in the pocket of a healthcare practitioner. This study is the first step towards  
12 the production of a shared knowledge collection resource, which can be used by all health  
13 and social care practitioners involved in the admission and discharge of patients from an  
14 acute mental health ward. If this is shown to be effective, further funding will be sought to  
15 develop and roll out an electronic version.  
16  
17  
18  
19  
20  
21  
22  
23  
24  
25  
26  
27  
28  
29

## 30 **METHODS AND ANALYSIS**

31  
32  
33 Service users will be involved at every stage of the planning and management of the study.  
34 We will convene a small group of approximately five members who have had recent  
35 experience of being admitted and discharged from hospital. This group will be facilitated by  
36 a member of the research team and will meet approximately bimonthly. They will discuss  
37 the planning and development of the project and intervention, be involved in data analysis  
38 and disseminate the study findings to service user forums and in service user focused  
39 publications. They will also be invited to be involved in the development of any subsequent  
40 research grant applications and follow on studies should these occur. If any members of the  
41 service user group wish to join the full study management team, they will be enabled to do  
42 this; otherwise their views and work will be relayed to the full team by the individual who  
43 facilitates the group. Service users will be paid a 'disruption' fee to cover their time and  
44 travel costs incurred through being involved in the study.  
45  
46  
47  
48  
49  
50  
51  
52  
53  
54

55 This study follows an improvement science approach. Although a relatively new term, which  
56 is often interchangeably used along with translational science, implementation science,  
57  
58  
59  
60

1  
2  
3 evidence-based practice, knowledge translation, and research utilisation, the overarching  
4 goal of improvement science is to ensure that quality improvement efforts are evidence  
5 based.<sup>47</sup> Improvement science offers a rigorous yet practical approach to understanding and  
6 implementing quality improvement, as it “inhabits the sphere between research and quality  
7 improvement by applying research methods to help understand what impacts on quality  
8 improvement”.<sup>48</sup> As such, it “focuses on systematically and rigorously exploring ‘what  
9 works’ to improve quality in healthcare and the best ways to measure and disseminate this  
10 to ensure positive change”.<sup>48</sup>

11  
12  
13  
14  
15  
16  
17  
18 The study will address the following research question:

19  
20  
21 How can inappropriate discharge and subsequent readmission be reduced  
22 through greater knowledge sharing during inpatient admission and discharge  
23 planning?  
24  
25  
26

27  
28 Secondary objectives are:

- 29  
30  
31 1. To explore the knowledge sharing process and procedure upon admission to an adult  
32 acute mental health ward.  
33  
34 2. To seek to improve knowledge sharing to prevent delayed discharge because of  
35 information gaps.  
36  
37

38  
39 Qualitative data collected will seek to understand the complex processes and blockages  
40 occurring during knowledge sharing linked to a patient’s admission and discharge from the  
41 acute ward. This will then be used by the research team to produce a knowledge collection  
42 proforma, which will aim to prompt healthcare practitioners to be aware of knowledge gaps  
43 in the patient’s history, and raise questions /take action where this is needed.  
44  
45  
46  
47

48  
49 Using a mixed methods approach, an in-depth understanding of the complex processes  
50 associated with being admitted and discharged from inpatient mental health wards will be  
51 ascertained. Healthcare practitioners’ (acute and community based) perceptions of the  
52 appropriateness of this new knowledge collection tool will be evaluated using qualitative  
53 methods, and will be supplemented by quantitative data analysis, through baseline and  
54 repeat measures of anonymised patient length of stay and readmission rates.  
55  
56  
57  
58  
59  
60

1  
2  
3 Anonymised baseline data collected at the start of the study will be repeated at the  
4 completion of the pilot, to measure any change has occurred in both average length of stay,  
5 and patient readmission rates. Readmission is defined locally as 'patient readmitted within a  
6 month of initial discharge'. Length of stay and readmission rate measures have been  
7 selected as they are both aligned to a CQUIN target (21 days median length of stay) and are  
8 requested by the local Clinical Commissioning Groups to inform their decision-making.  
9

10  
11  
12 The project is structured across a number work packages. The initial phase of the project  
13 will identify the relevant stakeholders and information sources involved in mental health  
14 admission and discharge. Subsequent work will engage and work with clinicians and  
15 healthcare workers to develop the intervention (the knowledge capture proforma) which  
16 will be piloted in the latter phases of the project. Following this we will ask those involved to  
17 reflect on their experiences of using the proforma, so that this can be used to further  
18 develop the intervention and apply for further funds for a larger scale study.  
19

- 20  
21  
22 • *Work package 1* will see anonymised baseline data taken on the average length of  
23 stay on the study site (Ward A) and readmission rates over the last calendar year.  
24 The study team will carry out a series of qualitative interviews with clinicians and  
25 healthcare practitioners working in acute and community care settings who are  
26 involved in the admission and discharge processes of patients into/out of Ward A.  
27 Additionally, any admission and discharge packs, or other knowledge collation  
28 documents, will be collected and studied, to identify what information is currently  
29 assembled, by whom and when, where it is stored and when it is used.  
30
- 31  
32 • *Work package 2* will draw on the learning from work package one, and will involve  
33 the production of a new knowledge capture proforma to be used at the time of the  
34 patient's admission onto the acute ward. Following the initial analysis of the data  
35 from work package one, the new proforma will be co-produced with members of the  
36 acute and community teams in a series of workshops. By co-designing the proforma  
37 in this manner – similar to a user-based design approach, it ensures that the resulting  
38 product is fit for use by the practitioners, as they have had a role in co-producing the  
39 outcome.  
40  
41  
42  
43  
44  
45  
46  
47  
48  
49  
50  
51  
52  
53  
54  
55  
56  
57  
58  
59  
60

- *Work package 3* will involve the roll-out of the knowledge collection proforma produced in work package two. Its introduction will be supported by a series of short presentations made by the study team to healthcare staff working in Ward A, as well as to those healthcare staff who are involved in the admission or discharge of patients from Ward A. The proforma will be piloted for two calendar months on Ward A.
- *Work package 4* will comprise of a series of evaluative qualitative interviews with the clinicians and practitioners who will have been using the new knowledge capture proforma. These interviews will collect data on perceptions and experiences of using the proforma, and whether practitioners feel its implementation and use has enhanced the admission and discharge process through having access to more knowledge about the patient. Repeated baseline measures on anonymised length of stay and readmission rates will be taken, to cover the pilot dates, in order to provide quantitative evidence of any effect that the form may have had.

The study follows a Plan-Do-Study-Act cycle.

1  
2  
3 Work packages 1 and 2 fall under the PLAN stage; work package 3 comprises of the DO  
4 stage; work package 4 fulfils the STUDY stage, whilst the final ACT stage will be covered in a  
5 future funding application, to develop this pilot study further, and to cover its rollout and  
6 evaluation across the whole of the NHS Trust involved.  
7  
8  
9

### 10 11 **Study configuration**

12  
13  
14 This is a single site study; the predominant focus is on a single acute mental health ward.  
15 However, in order to respond to the hypothesis and research objectives, it will also be  
16 necessary to include healthcare staff working in community care (employed by the same  
17 NHS Trust as the ward based staff) who are involved in the referral and admission/discharge  
18 process into / from Ward A.  
19  
20  
21  
22

23  
24 Ward A is a busy acute mental health ward in an urban setting within the UK. It has 20 beds  
25 for male patients. Patients typically have been diagnosed with schizophrenia, bipolar  
26 disorder, severe depression or borderline or anti-social personality disorder, often with co-  
27 morbid substance misuse problems and sometimes with other physical health problems.  
28  
29  
30  
31

### 32 *Recruitment*

33  
34  
35 Participants for the study will all be employed by the NHS Trust, and either be working on  
36 Ward A or be a member of a community team (e.g. Crisis Teams, Community Assessment  
37 and Treatment, Early Intervention in Psychosis, Recovery and Assertive Outreach, CMHTs)  
38 which admits service users to the ward or is involved in their care following discharge. No  
39 service users or their carers / family members will be recruited to participate in the study at  
40 this stage. The initial approach will be from AC, who is a consultant on the ward, and will be  
41 made verbally and followed up in writing, accompanied by a participant information sheet  
42 and consent form.  
43  
44  
45  
46  
47  
48  
49

### 50 *Sample size and justification*

51  
52  
53 Sample size is determined by the number of relevant stakeholders working in / into Ward A,  
54 rather than by power calculations or expectations about study dropout. The sample size will  
55 be approximately 50 healthcare practitioners. This number covers all those healthcare  
56  
57  
58  
59  
60

1  
2  
3 workers who would reasonably be expected to have some interaction with Ward A in  
4 relation to the admission or discharge of a patient.  
5  
6

7  
8 *Eligibility criteria*  
9

10  
11 In order to be eligible to be involved in the study, participants should be employed by the  
12 NHS Trust and have a role in the admission and/or discharge of patients from Ward A.  
13  
14

15 Consequently, in order to be eligible to be included in the study, participants should be:  
16

- 17 · Aged between 18 and 65 years of age.
- 18 · Working in the NHS.
- 19 · Involved in the admission and/or discharge of patients from Ward A  
20  
21  
22  
23

24 Conversely, individuals will be excluded from participating in the study if they are not  
25 employed by the NHS Trust; have no experience of admission / discharge of patients into /  
26 from Ward A, and are unable to give consent.  
27  
28  
29  
30

31 All participants will provide informed consent before being enrolled in the study.  
32  
33

34 *Data collection*  
35

36  
37 As illustrated in table 1, two sets of qualitative interviews will be held with all healthcare  
38 practitioners who interact with Ward A regarding the admission and discharge of patients;  
39 these are scheduled to take place during work packages one and three. Qualitative  
40 interviews have been chosen as a data collection technique as enable the space for  
41 reflective reporting and open discussion of the phenomena under investigation. To this end,  
42 a topic guide will be utilised (see table 2 for an indicative illustration of the topics that might  
43 be covered). Interviews will be carried out by NW and ER, recorded with participants'  
44 consent, and transcribed verbatim.  
45  
46  
47  
48  
49  
50

51  
52 Work package two involves a series of co-design workshops with the health care  
53 practitioners previously interviewed. These workshops will be practical in focus, and will  
54 seek to produce a knowledge capture proforma, that will ensure that knowledge regarding  
55 admission and discharge is shared between the different healthcare practitioners. Co-design  
56  
57  
58  
59  
60

is founded on the principle that “making it “better” is possible if users are involved in the design process.<sup>49</sup> The approach, while practical, also enables discussion of “how well people understand [the intervention being designed], how they feel about it while they are using it, how well it serves its purpose, and how well it fits into the context in which they are using it”.<sup>49</sup> It is this “knowledge of the experience” in relation to the problems and potential solutions to knowledge sharing and capture in relation admission and discharge from the acute mental health ward, that is “unique and precious”.<sup>49</sup>

Marshall and colleagues argue how “improvement science needs a genuine partnership between academics and front-line practitioners.<sup>50</sup> Researchers bring scepticism, scientific rigour, and methodological technical expertise, whereas practitioners bring content knowledge, a thorough understanding of working contexts, and practical wisdom. Academics and service partners need to collaborate to design, undertake, and interpret the work of improvement science”. Together, the two approaches of co-design and improvement science offer potential to produce a step change in knowledge sharing, and reduce the delays to discharge caused by communication failure.

Table 1: Study Regime

|                                                                                                        | Timeline                        | Research team activities                                                                                                                                                   | Participant involvement                                                                                                                                                                                      |
|--------------------------------------------------------------------------------------------------------|---------------------------------|----------------------------------------------------------------------------------------------------------------------------------------------------------------------------|--------------------------------------------------------------------------------------------------------------------------------------------------------------------------------------------------------------|
| Work package 1:<br> | Late Autumn 2013 – January 2014 | <ul style="list-style-type: none"> <li>• Baseline data collection</li> <li>• Collection &amp; analysis of admission and discharge documents</li> <li>• Analysis</li> </ul> | i. Participants to be identified (by AC, acting as gatekeeper to the clinical setting)<br>ii. Invitations issued, accompanied by Participant Information Sheet and Consent Form)<br>iii. Interview scheduled |

|                                                                                                            |                         |                                                                                                                               |                                                                                                                                                                         |
|------------------------------------------------------------------------------------------------------------|-------------------------|-------------------------------------------------------------------------------------------------------------------------------|-------------------------------------------------------------------------------------------------------------------------------------------------------------------------|
|                                                                                                            |                         |                                                                                                                               | iv. Interview takes place                                                                                                                                               |
| <p>Work package 2:</p> 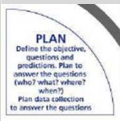   | January – February 2014 | <ul style="list-style-type: none"> <li>Analysis</li> </ul>                                                                    | <p>i. Participants invited to participate in co-production / co-design workshops for knowledge capture tool / proforma</p> <p>ii. Workshops arranged and take place</p> |
| <p>Work package 3:</p>   | March – April 2014      | <ul style="list-style-type: none"> <li>Roll out of the knowledge capture tool, supported by training presentations</li> </ul> |                                                                                                                                                                         |
| <p>Work package 4:</p>  | May – November 2014     | <ul style="list-style-type: none"> <li>Repeat measures</li> <li>Analysis</li> <li>Reporting and dissemination</li> </ul>      | <p>i. Staff interviews regarding their perceptions and experiences of using the knowledge capture tool.</p>                                                             |

Table 2: Interview topic guides

| Topics to be covered in Work package 1 interviews                                                                                 | Topics to be covered in Work package 3 interviews                                            |
|-----------------------------------------------------------------------------------------------------------------------------------|----------------------------------------------------------------------------------------------|
| <ul style="list-style-type: none"> <li>Experiences of patient admission process onto Ward A – what is involved, who is</li> </ul> | <ul style="list-style-type: none"> <li>About using the new knowledge capture form</li> </ul> |



|                                                                                                                                                                                                                                                                                                                                                                                                                                                                                                                                                                                                                                   |                                                                                                                                                                                                                                                                                                                                                                                                                                                                                                                                                                                                                                                            |
|-----------------------------------------------------------------------------------------------------------------------------------------------------------------------------------------------------------------------------------------------------------------------------------------------------------------------------------------------------------------------------------------------------------------------------------------------------------------------------------------------------------------------------------------------------------------------------------------------------------------------------------|------------------------------------------------------------------------------------------------------------------------------------------------------------------------------------------------------------------------------------------------------------------------------------------------------------------------------------------------------------------------------------------------------------------------------------------------------------------------------------------------------------------------------------------------------------------------------------------------------------------------------------------------------------|
| <p>involved, how long does it take?</p> <ul style="list-style-type: none"> <li>• Perceived problems with the patient admission process.</li> <li>• How, when and by whom is knowledge and information is gained, stored and shared?</li> <li>• Experiences of patient discharge process from Ward A – what is involved, who is involved, how long does it take?</li> <li>• Perceived problems with the patient admission process.</li> <li>• How, when and by whom is knowledge and information is gained, stored and shared?</li> <li>• About delays in discharge – how often? Caused by what? What knock-on effects?</li> </ul> | <ul style="list-style-type: none"> <li>• Did knowledge sharing in relation to patient admission process onto Ward A improve whilst the form was being used?</li> <li>• Any problems with the form?</li> <li>• How might it be improved?</li> <li>• Having used the form, how, when and by whom is knowledge and information is gained, stored and shared?</li> <li>• Following using the form, what have been the experiences of patient discharge process from Ward A – what is involved, who is involved, how long does it take?</li> <li>• Have delays in discharge through gaps in knowledge about a patient's circumstances, been reduced?</li> </ul> |
|-----------------------------------------------------------------------------------------------------------------------------------------------------------------------------------------------------------------------------------------------------------------------------------------------------------------------------------------------------------------------------------------------------------------------------------------------------------------------------------------------------------------------------------------------------------------------------------------------------------------------------------|------------------------------------------------------------------------------------------------------------------------------------------------------------------------------------------------------------------------------------------------------------------------------------------------------------------------------------------------------------------------------------------------------------------------------------------------------------------------------------------------------------------------------------------------------------------------------------------------------------------------------------------------------------|

### Data analysis

The interview data will be analysed using conventional qualitative methods, and will identify analytical patterns from across individual respondent and wider service.<sup>51 52</sup> Analysis will be inductive, although it will be influenced by the study's theoretical framework of knowledge brokering and knowledge mobilisation.<sup>31 53-55</sup>

Thematic analysis has been chosen as it “provides a concise, coherent, logical, non-repetitive and interesting account of the story the data tell”.<sup>56</sup> Although time intensive - it requires the research team to spend time engaging with the data, reading and rereading the interview transcriptions and listening to the audio recordings of interviews – we believe that it offers unparalleled advantages in ‘getting to know’ your data. In turn, this “generates understanding, insight and familiarity, which are the building blocks of analysis”.<sup>56</sup> The research team will start to identify and code (by highlighting) parts or chunks of the data that they deem to be about the same topic, concept or idea. It is likely that many sections of

1  
2  
3 the data will be given multiple codes, implying that the section/extract is about more than  
4 one topic, or idea. As codes are developed it is also important to revisit the rest of the data  
5 to see if that code also applies to other parts of the data. Initially, the data will be analysed  
6 separately by each member of the research team; following initial coding, the research team  
7 will hold regular data meetings in which they will work collaboratively on the analysis of the  
8 interview materials.  
9

10  
11  
12  
13  
14  
15 Due to the need for the research team to analyse the data collaboratively, a CAQDAS  
16 (Computer Assisted Qualitative Data Analysis) package, NVivo, will be used. This will allow  
17 each member of the research team to add their own comments and analysis. The use of  
18 NVivo allows for sections of the transcript to be tagged, or highlighted and named with a  
19 certain code or label; these programmes do not undertake the analysis of the data for you,  
20 but they do allow the electronic data to be coded and searched, for notes to be written to  
21 accompany codes and data extracts, for the data to be more easily navigated, and for the  
22 accumulating analytical work to be located on a single data corpus. While early reading and  
23 immersion in the data can be done using hard copies of the transcripts, once a number of  
24 initial codes have been generated, transcripts will be imported into NVivo, with all coding of  
25 the data undertaken on the electronic versions of the transcripts from then on.  
26  
27  
28  
29  
30  
31  
32  
33  
34

35  
36 Following this preliminary analysis stage, in which all the data extracts will have been coded  
37 in a general sense, data will again be examined in order to identify the wider themes and  
38 analytical narrative.  
39

40  
41  
42 The quantitative data from the baseline and repeat measures (Length of Stay; Readmission  
43 Rates) will be analysed simply; given the complexity of the admission/discharge process, it  
44 will not be possible to statistically show the 'effect' of the proforma due to so many  
45 confounding influences. However, by running simple statistical tests (such as median length  
46 of stay, and average readmission rates) over two time periods (before / during the use of  
47 the proforma), we may be able to see some difference, which would then suggest the need  
48 for more detailed, subsequent investigation if the research were to be repeated on a larger  
49 scale.  
50  
51  
52  
53  
54  
55

## 56 57 **ETHICS AND DISSEMINATION** 58 59 60

1  
2  
3 Whilst the ethical issues faced in policy-oriented, qualitative research are not of the same  
4 order as those facing research involving invasive clinical interventions, this is not to say that  
5 they can be brushed aside. The ethical and design issues that are of particular importance in  
6 this kind of research relate to the need to recognise the ways in which the social  
7 relationships relating to the phenomena being studied may impact on the research process,  
8 by impeding some participants from fully expressing their views while encouraging others to  
9 do so.

10  
11  
12  
13  
14  
15  
16 A key issue is that participants in this research will be asked to comment frankly on  
17 something which is a core part of their work, as this relates to the actions of other  
18 individuals and organisations involved in knowledge sharing and brokering during the  
19 admission and discharge processes. From the point of view of us as researchers, of good  
20 research practice, and of the participants themselves, it is clearly important that those  
21 involved are as frank as possible, so that we might get a clear picture of the what has helped  
22 and obstructed the knowledge brokering during admission and discharge process in the  
23 particular context of acute mental health. If some respondents are franker than others, we  
24 may get a skewed view, and of the role of different factors and individuals in the process.  
25 This quandary is amplified by the fact that there may well be entrenched power  
26 relationships within the groups of individuals being studied, with certain parties exerting  
27 considerably more influence than others, which may make those less influential parties  
28 more reluctant to be frank. For example, senior consultants are likely to be perceived by  
29 other participants, as more powerful than a healthcare assistant or an occupational  
30 therapist. For this reason, we will carefully manage group dynamics during the co-design  
31 workshops, to ensure that all parties are able to equally and fully participate.

32  
33  
34  
35  
36  
37  
38  
39  
40  
41  
42  
43  
44  
45  
46 When discussing the research with participants at the recruitment stage, we will emphasise  
47 that the views of all involved are equally important, and that we will make every effort to  
48 use what they tell us in a non-attributable way.  
49  
50

#### 51 52 *Dissemination*

53  
54  
55 Study results will be published and disseminated in a variety of ways. A report of the study  
56 will be produced, including an executive summary which will be distributed to participants  
57  
58  
59  
60

1  
2  
3 and any other interested party. Peer-reviewed publications in academic outlets will be  
4 pursued, as will outputs in practitioner-oriented publications. Participants will not be  
5 identified in any publications.  
6  
7

8  
9  
10 This study sets out to co-produce a solution to an enduring problem in healthcare practice.  
11 Knowledge sharing amongst different healthcare teams is neither a new phenomenon nor  
12 something that is recognised as easily solved. It is also something that many researchers  
13 before us have attempted to improve. However, our focus on knowledge sharing upon  
14 admission and discharge from an acute mental health ward, informed by improvement  
15 science and co-design approaches, offers a potential solution that is locally produced and  
16 owned. We hope that this approach will offer sustained benefits to patients and healthcare  
17 practitioners.  
18  
19  
20  
21  
22

#### 23 24 25 **ACKNOWLEDGMENTS, COMPETING INTERESTS & FUNDING**

26  
27  
28 **Authors' contributions:** ER led the development of the study protocol and this paper. NW,  
29 JW, KG and AC commented on drafts of the protocol and the paper.  
30  
31

32  
33 **Funding statement:** This work was supported by Nottingham University Business School's  
34 'Spark' research fund. ER and JW are members of NIHR CLAHRC East Midlands, and as such,  
35 their involvement was funded by the NIHR. The views expressed are those of the authors  
36 and not necessarily those of the NHS, the NIHR, or the Department of Health.  
37  
38  
39

40  
41 **Competing interests statement:** AC is the main consultant psychiatrist on the ward where  
42 the study will be conducted, and is the problem owner, having identified the issue requiring  
43 improvement and bringing it to other members of the research team. KG is a senior nurse  
44 on the ward. To maintain objectivity and minimise threats of bias, neither AC nor KG will be  
45 involved in data collection or preliminary analysis. They will only have access to anonymised  
46 data that is used by the research team in producing the analytical narrative. At all times, the  
47 team will be mindful of any potential loss of objectivity, and as such, data analysis will be led  
48 by ER and NW.  
49  
50  
51  
52  
53  
54  
55  
56  
57  
58  
59  
60

## REFERENCE LIST

1. Commission CQ. Board Paper: Thematic reviews – future topics and a proposals for a more systematic approach to topic selection, 2013.
2. Chopra A. Are our mental health services in crisis? *Nottinghamshire Fabian Society*, 2013.
3. Hudson JaW, M. The National AMHP Survey 2012: Final Report – Stress and the Statutory Role: Is There a Difference Between Professional Groups? , 2012.
4. Centre HaSCI. Inpatients formally detained in hospitals under the Mental Health Act 1983, and patients subject to supervised community treatment, Annual figures, England, 2011/12 2013.
5. Thornicroft G, Farrelly S, Szumukler G, et al. Clinical outcomes of Joint Crisis Plans to reduce compulsory treatment for people with psychosis: a randomised controlled trial. *The Lancet* 2013;381(9878):1634-41.
6. Cook JA, Copeland ME, Hamilton MM, et al. Initial outcomes of a mental illness self-management program based on wellness recovery action planning. *Psychiatr Serv* 2009;60(2):246-9.
7. Priebe S, Fakhoury W, Watts J, et al. Assertive outreach teams in London: patient characteristics and outcomes. Pan-London Assertive Outreach Study, part 3. *The British journal of psychiatry : the journal of mental science* 2003;183:148-54.
8. Durbin J, Barnsley J, Finlayson B, et al. Quality of Communication Between Primary Health Care and Mental Health Care: An Examination of Referral and Discharge Letters. *J Behav Health Ser R* 2012;39(4):445-61.
9. Jerpersen S, Chang, T., Donegan, T., et al. Reflections on facilitated discharge from a mental health service. *Australasian Psychiatry* 2009;17(3):195-201.
10. Impey MaM, E. Delayed discharge from mental health inpatient care in the UK *Mental Health Practice* 2013;16(9):31-35.
11. Lewis R, Glasby J. Delayed discharge from mental health hospitals: results of an English postal survey. *Health & social care in the community* 2006;14(3):225-30.
12. Steffen S, Koster, M., Becker, T., Pvschner, B. Discharge planning in mental health care: a systematic review of the literature. *Acta Psychiatrica Scandinavica* 2009;120:1-9.
13. Martin ML, Jensen, E., Coatsworth-Puspoky, R., et al. Integrating an evidence based research intervention in the discharge of mental health clients. *Archives of Psychiatric Nursing* 2007;21(2):101-11.
14. Meehan J, Kapur N, Hunt IM, et al. Suicide in mental health in-patients and within 3 months of discharge. National clinical survey. *The British journal of psychiatry : the journal of mental science* 2006;188:129-34.
15. Gainsbury C. Calculating the cost of mental health. *Health Services Journal*, 2012.
16. England CSINIfMHi. A positive outlook: a good practice toolkit to improve discharge from inpatient mental health care, 2007.
17. Waring J, Currie G, Crompton A, et al. An exploratory study of knowledge brokering in hospital settings: Facilitating knowledge sharing and learning for patient safety? *Social Science & Medicine* 2013;98(0):79-86.
18. Perrow C, Wilensky HL, Reiss AJ. *Complex organizations: A critical essay*: McGraw-Hill New York, 1986.
19. Parent R, Roy M, St-Jeacques D. A systems-based dynamic knowledge transfer capacity model. *Journal of Knowledge Management* 2007;11(6):81-93.
20. Jensen CB. Sociology, systems and (patient) safety: knowledge translations in healthcare policy. *Sociology of Health & Illness* 2008;30(2):309-24.
21. Ward V, Smith S, House A, et al. Exploring knowledge exchange: A useful framework for practice and policy. *Soc. Sci. Med.* 2011:1-8.
22. Wilkinson H, Gallagher M, Smith M. A collaborative approach to defining the usefulness of impact: lessons from a knowledge exchange project involving academics and social work practitioners. *Evidence & Policy* 2012;8(3):311-27.

- 1
- 2
- 3 23. Sullivan H, Williams P. Emerald Article: Whose kettle?: Exploring the role of objects in
- 4 managing and meditating the boundaries of integration in health and social care.
- 5 *Journal of Health Organization and Management* 2012;26(6):697-712.
- 6 24. Klijn E-H, Teisman GR. Institutional and Strategic Barriers to Public—Private
- 7 Partnership: An Analysis of Dutch Cases. *Public money and Management*
- 8 2003;23(3):137-46.
- 9 25. Bate SP, Robert G. Knowledge Management and communities of practice in the private
- 10 sector: lessons for modernising the National Health Service in England and Wales.
- 11 *Public Administration* 2002;80(4):643-63.
- 12 26. Addicott R, McGivern G, Ferlie E. Networks, Organizational Learning and Knowledge
- 13 Management: NHS Cancer Networks. *Public Money & Management* 2006;26(2):87-
- 14 94.
- 15 27. Cross R, Borgatti SP. The ties that share: Relational characteristics that facilitate
- 16 information seeking. *Social capital and information technology* 2004:137-61.
- 17 28. Chumer M, Willmott H. Managing knowledge: critical investigations of work and learning:
- 18 New York, 2000.
- 19 29. Swan JaS, H. Explaining the diffusion of knowledge management: The role of fashion.
- 20 *British Journal of Management* 2001;12:3-12.
- 21 30. Lave J. Situating learning in communities of practice. In: Resnick L, Levine J, Teasley S,
- 22 editors. *Perspectives on socially shared cognition*. Washington, DC, US: American
- 23 Psychological Association, 1991.
- 24 31. Lomas J. The in-between world of knowledge brokering. *BMJ* 2007;334(Jan 2007):129-
- 25 32.
- 26 32. Commission A. The way to go home; rehabilitation and remedial services for older
- 27 people. London, 2000.
- 28 33. Health Do. Discharge from hospital: Pathway, Process and Practice. London: The
- 29 Stationary Office, 2003.
- 30 34. Agency NPS. National Reporting and Learning System Quarterly Data Summary -
- 31 England, Issue 13. London: NPSA, 2009.
- 32 35. Vaughan D. The Dark Side of Organizations: Mistake, Misconduct and Disaster. *Annu.*
- 33 *Rev. Sociol.* 1999;25:271-305.
- 34 36. Currie G, Waring J, Finn R. The limits of knowledge management for UK public services
- 35 modernization: the case of patient safety and service quality. *Public Administration*
- 36 2008;86(2):363-85.
- 37 37. Glasby J. *Hospital discharge: integrating health and social care*: Radcliffe Publishing,
- 38 2003.
- 39 38. Akkerman SF, Bakker A. Boundary Crossing and Boundary Objects. *Review of*
- 40 *Educational Research* 2011;81(2):132-69.
- 41 39. Chreim S, Langley A, Comeau-Vallee M, et al. Leadership as boundary work in
- 42 healthcare teams. *Leadership* 2013;9(2):201-28.
- 43 40. Braithwaite J. Between-group behaviour in health care: gaps, edges, boundaries,
- 44 disconnections, weak ties, spaces and holes. A systematic review. *BMC Health*
- 45 *Services Research* 2010;10(330):1-11.
- 46 41. Long JC, Cunningham FC, Braithwaite J. Bridges, brokers and boundary spanners in
- 47 collaborative networks: a systematic review. *BMC Health Services Research*
- 48 2013;13(158):1-13.
- 49 42. Powell AE, Davies HTO. The struggle to improve patient care in the face of professional
- 50 boundaries. *Soc. Sci. Med.* 2012;75:807-14.
- 51 43. Engeström Y, Engeström R, Kärkkäinen M. Polycontextuality and boundary crossing in
- 52 expert cognition: Learning and problem solving in complex work activities. *Learning*
- 53 *and instruction* 1995;5(4):319-36.
- 54 44. Swan J, Scarbrough H. The politics of networked innovation. *Human Relations*
- 55 2005;58(7):913-42.
- 56
- 57
- 58
- 59
- 60

- 1
- 2
- 3 45. Braithwaite J, Runciman WB, Merry AF. Towards safer, better healthcare: harnessing
- 4 the natural properties of complex sociotechnical systems. *Qual Saf Health Care*
- 5 2009;18:37-41.
- 6 46. Centre HaSCI. Standards for the clinical structure and content of patient records, 2013.
- 7 47. Shojania KG, Grimshaw JM. Evidence-based quality improvement: the state of the
- 8 science. *Health affairs* 2005;24(1):138-50.
- 9 48. Foundation TH. Improvement Science: research scan. London: The Health Foundation,
- 10 2011.
- 11 49. Bate P, Robert G. Experience-based design: from redesigning the system around the
- 12 patient to co-designing services with the patient. *Quality and Safety in Health Care*
- 13 2006;15(5):307-10.
- 14 50. Marshall M, Pronovost P, Dixon-Woods M. Promotion of improvement as a science. *The*
- 15 *Lancet* 2013;381(9864):419-21.
- 16 51. Ritchie J, Spencer L. Qualitative data analysis for applied policy research, Bryman A.,
- 17 Burgess RG, Analyzing qualitative data, 1994, 173-194: Routledge, London.
- 18 52. Huberman A, Miles M. Data Management and Analysis Methods in: Denzin, NK and
- 19 Lincoln, YS (eds.)(1998) Collecting and Interpreting Qualitative Materials: Sage
- 20 Publications, Thousand Oaks, 1998.
- 21 53. Carlile PR. A Pragmatic View of Knowledge and Boundaries: Boundary Objects in New
- 22 Product Development\*. *Organization Science* 2002;13(4):442-45.
- 23 54. Davies HTO, Nutley SM, Walter I. Why 'knowledge transfer' is misconceived for applied
- 24 social research. *J Health Serv Res Policy* 2008;13(3):188-90.
- 25 55. Tetroe J, Graham ID. How to Translate Health Research Knowledge into Effective
- 26 Healthcare Action. *Healthcare Quarterly* 2007;10(3):20-22.
- 27 56. Rowley E. Protocol for a qualitative study exploring the roles of 'Diffusion Fellows' in
- 28 bridging the research to practice gap in the Nottinghamshire, Derbyshire and
- 29 Lincolnshire Collaboration for Leadership in Applied Health Research and Care
- 30 (CLAHRC-NDL). *BMJ* 2012;2012(2):1-7.
- 31
- 32
- 33
- 34
- 35
- 36
- 37
- 38
- 39
- 40
- 41
- 42
- 43
- 44
- 45
- 46
- 47
- 48
- 49
- 50
- 51
- 52
- 53
- 54
- 55
- 56
- 57
- 58
- 59
- 60

**Title:**

Protocol for ~~an qualitative~~ exploration of knowledge sharing for improved discharge from a mental health ward.

**Corresponding author:**

Emma Rowley, Centre for Health Innovation, Leadership & Learning, Nottingham University Business School, c/o Institute of Mental Health, University of Nottingham Innovation Park, Triumph Road, Nottingham, NG7 2TU. Email: [emma.rowley@nottingham.ac.uk](mailto:emma.rowley@nottingham.ac.uk). Telephone: 0115 82 31313.

**Co-authors:**

Nicola Wright, School of Health Sciences, University of Nottingham, UK.

Justin Waring, Centre for Health Innovation, Leadership & Learning, Nottingham University Business School, Nottingham, UK.

Kyri Gregoriou, Adult Mental Health, Nottinghamshire Healthcare NHS Trust, Nottingham, UK.

Arun Chopra, Adult Mental Health, Nottinghamshire Healthcare NHS Trust, Nottingham, UK.

**MeSH terms:**

Mental health, knowledge sharing, patient admission, patient discharge, improvement science.

**Word count:**

~~5435-6299~~



## ABSTRACT

**Introduction:** Strategies to reduce hospital admissions for mental health service users have received vast amounts of attention, yet the transfer of care from hospital to the community has been ignored. The discharge process is complex, messy, disjointed and inefficient, relying on cross agency and organisational working. Focusing on one acute mental health admission ward, we will investigate whether the discharge process for people with severe mental health problems can be enhanced, through the creation, implementation and utilisation of a knowledge sharing proforma which is used upon their admission to the ward.

**Methods & analysis:** The project uses qualitative interviews to understand the complex processes associated with being admitted and discharged from inpatient mental health wards. Practitioners will be asked to identify and map the relevant stakeholders involved in admission and discharge, and discuss any problems with the process. ~~Following this, the~~ The study team will work with clinicians to develop a knowledge collection proforma, ~~which -~~ ~~This~~ will be piloted for 2 months, ~~after which~~ qualitative interviews will be carried out to collect reflections on the experiences of using the tool, with data used for further refinement of the intervention. Baseline and repeat quantitative measures will be taken to illustrate any changes to length of stay and readmission rates achieved as a result of the study.

**Ethics & dissemination:** A key issue is that participants are able to comment frankly on something which is a core part of their work, without fear or reprisal. It is equally important that all participants are offered the opportunity to develop and co-produce the knowledge collection proforma, in order that the intervention produced is fit for purpose and usable in the real world, away from a research environment. The study has received ethical approval from Nottingham University Business School [ethics committee](#), and has all appropriate NHS [research](#) governance clearances.

### **Strengths and limitations of this study**

#### **Strengths:**

- [Applied health research – takes complex social theory ideas and applies them to an area of healthcare that is often ignored \(mental health\)](#)

1  
2  
3  
4  
5  
6  
7  
8  
9  
10  
11  
12  
13  
14  
15  
16  
17  
18  
19  
20  
21  
22  
23  
24  
25  
26  
27  
28  
29  
30  
31  
32  
33  
34  
35  
36  
37  
38  
39  
40  
41  
42  
43  
44  
45  
46  
47  
48  
49  
50  
51  
52  
53  
54  
55  
56  
57  
58  
59  
60

- Study and intervention is co-produced with end-users

Limitations:

- Exploratory study – data collection on only one ward
- Quantitative measures likely to influenced by complex healthcare context

For peer review only

## INTRODUCTION

The Care Quality Commission, the UK's healthcare regulator, has recently suggested that the lack of psychiatric inpatient beds is causing stress to services and patients.<sup>1</sup> At the same time, there is growing evidence that Approved Mental Health Professionals are detaining people under a section, illegally, in order to obtain a bed (Hudson and Webber 2012, Chopra 2013).<sup>2,3</sup>

In the UK, 10% of psychiatric beds (1,700 beds) have been cut ~~over the last years~~ since 2011.<sup>4</sup> Conversely, the numbers of people detained under the Mental Health Act reached a record high in 2011/12 with 48,600 people being detained, a 5% rise on 2010/11 levels.<sup>4</sup>

Many NHS Mental Health Trusts have adopted functional splits to inpatient and outpatient care, whereby different teams lead care and treatment with an individual at different phases of their illness. However, rather than continue to work in these operational silos, inpatient and outpatient teams need to seamlessly interact with the admitted service user to develop a single narrative and purpose to the admission, while also participating fully in the process of discharge. We believe that there is scope to improve this practice, with the increased efficiency in knowledge sharing leading to timelier, safer and higher quality discharges.

Strategies to reduce hospital admissions and to help mental health service users remain in the community have received the attention of researchers. Studies have explored the efficacy of crisis care planning,<sup>5</sup> recovery planning<sup>6</sup> and the effectiveness of service delivery models such as Assertive Outreach.<sup>7</sup> However, the same cannot be said for the transfer of care from hospital back to home, or from hospital-based to community-based care.

Locally in the East Midlands (UK), about 10% of patients are readmitted within a month of discharge, although this figure varies between different wards. There is no published national data on readmission rates. Readmission rates act as a proxy measure, albeit a crude one, for failed discharge. There has been no study looking at the factors that are associated with higher readmission rates.

1  
2  
3  
4  
5  
6  
7 We completed a literature review using search terms: mental health, discharge, adult (aged  
8 18-65 years), acute and inpatient, using the ASSIA, CINAHL, EMBASE, MEDLINE and  
9 PSYCHINFO electronic databases. This returned only 139 citations, of which just six full text  
10 empirical papers were obtained. To be included in our review, papers needed to be  
11 published since 2000. This was justified on the basis that studies needed to be relevant to  
12 current mental healthcare provision. In total, 139 citations were returned, and following the  
13 removal of duplicates, non-empirical literature and studies not conducted within mental  
14 health services, six full-text papers were obtained. , so that they explored relatively  
15 contemporary healthcare issues and experiences.

16  
17  
18  
19  
20  
21 Of the papers included, two were from the UK, one each from Australia, Canada, Germany  
22 and the USA. Due to the heterogeneity in the study designs (one systematic literature  
23 review, one qualitative study, one retrospective case note analysis and four surveys) a  
24 narrative approach to the synthesis of the identified literature was adopted and the key  
25 areas highlighted were:  
26  
27  
28

- 29 • The handover of information between professionals.<sup>8</sup>
- 30 • Facilitative discharge approaches.<sup>9</sup>
- 31 • The challenges of delayed discharge.<sup>10 11</sup>
- 32 • Discharge planning interventions specifically in relation to outpatient follow-up  
33 appointments.<sup>12</sup>
- 34 • The use of an inpatient keyworker and peer support worker to assist service users  
35 with the transition from hospital to the community.<sup>13</sup>

36  
37  
38  
39  
40  
41  
42 Despite the different methods employed, these studies have highlighted some useful  
43 findings. Regardless of the service and organizational variations across the different  
44 countries these papers originated from, the problems and difficulties encountered in  
45 sharing information between professionals working in inpatient and community settings  
46 was consistent. For example, Durbin *et al.*<sup>8</sup> describe the quality of information sharing and  
47 reporting between primary care and mental health services that takes place at referral and  
48 post discharge as, at best, variable. However, the use of interventions, such as liaison  
49 services<sup>12</sup> and specific workers to assist service users with the transition from hospital to  
50 community, were found to produce improvements<sup>8 9 12</sup> and therefore demonstrate that this  
51  
52  
53  
54  
55

1  
2  
3  
4  
5  
6  
7 process is amenable to intervention. The issue of 'delayed discharge' at an organizational  
8 level was explored by the two UK based studies<sup>10 11</sup>. Although they both highlight that there  
9 are differences in the reporting and definition of 'delayed discharges' across the UK, delayed  
10 discharges remain a concern with potential financial ramifications. Lewis and Glasby<sup>11</sup>  
11 suggest that organisations are desperate to tackle delayed discharges by any means  
12 possible. This includes supporting policy directives, such as reimbursement, when in other  
13 circumstances they would not do so.  
14  
15  
16  
17

18 Although these studies have highlighted some interesting findings, the lack of a robust  
19 evidence base indicates a need for further research into the transfer of care process,  
20 particularly as a 'critical period' of post-discharge care (the first seven days) when people  
21 with mental health problems are at increased risk of suicide has been identified.<sup>14</sup> Suicide is  
22 a devastating consequence for the individual, their families and mental health professionals,  
23 but is also relatively rare. In contrast, a range of more frequent and 'mundane' care  
24 problems often arise from care transition planning that impact the costs and quality of life  
25 for people with mental health problems and their carers. Although there is a lack of  
26 evidence exploring these ~~factors~~ problems, anecdotal reports highlight difficulties such as  
27 medication not being available for service users on their return to the community,  
28 community nurses and social workers not being aware that an individual has been  
29 discharged and disruption in social security benefits leaving services users without an  
30 income and being financially dependent on others. In relation to delayed discharge from  
31 hospital, each additional day on the ward incurs a cost in excess of ~~£400~~ £340<sup>15</sup>, whilst the  
32 Care Services Partnership and the National Institute for Mental Health in England identify  
33 the following 'human' consequences:  
34  
35  
36  
37  
38  
39  
40  
41  
42

- 43 • Stressed, bored and anxious inpatients.
- 44 • Increased lengths of time other service users wait for therapeutic intervention  
45 and arrangement of care packages.
- 46 • Overstretched and insufficient staff.
- 47 • An increased risk of serious incidents, substance misuse, self-harm, violence and  
48 aggression on the wards.
- 49
- 50
- 51
- 52
- 53
- 54
- 55
- 56
- 57
- 58
- 59
- 60

- Potential delays in admitting appropriate at risk service users or the premature discharge of others.
- Inappropriate transfer of service users between wards and services.
- An increased risk of service user dependence on inpatient care and subsequent loss of coping skills post discharge.
- The loss of community contacts and supports such as friends, tenancies and employment.
- A negative impact on staff morale, retention and recruitment.<sup>16</sup>

~~Discharge is also often perceived as a one-off event at the end of an admission.~~ Research by Waring and colleagues shows that discharge planning and the transition of care is located within complex systems of interacting and inter-dependent actors.<sup>17</sup> Strategies to coordinate the work of heterogeneous actors and mitigate system complexity are increasingly recognised within the social science literature,<sup>18</sup> but have not been applied to the problems of hospital discharge for people with mental health problems. In particular, the social science literature highlights the importance of knowledge sharing as a basis of collaboration and coordination.<sup>19-22</sup>

Sullivan and Williams suggest that “the health, social care and wellbeing needs of vulnerable people are complex and interrelated. They require carefully planned, co-ordinated and delivered interventions from a number of different professional groups working together”,<sup>23</sup> yet healthcare delivery is increasingly categorised by its fragmented, multi-professional teams and partnerships that cross organisational boundaries, and as such, “the provision of seamless health and social care remains problematic”.<sup>23</sup>

A recent (unpublished) audit carried out in the study site in the NHS Trust where this research is to take place has shown that the admission and discharge process is complex, multi-faceted and involves a significant number of healthcare practitioners from across a variety of different occupations and agencies. Significantly, although all these practitioners hold knowledge about the patient’s transition of care, there is no central knowledge repository where all this information is being collated in a manner that allows for its readily available access and utility. Although the Trust has recently introduced electronic patient records, the number of computers on the ward is limited, which means timely and

1  
2  
3  
4  
5  
6  
7 immediate access to records (as well as updating them) can be problematic. This results in  
8 Rather, information is-being variously recorded in different sections of the patient's notes,  
9 where each clinical grouping makes notes in 'their' section, often without cross-referral to  
10 other sections. This information is then later transposed onto the electronic health record,  
11 often by ward administrative staff.

12  
13  
14  
15 A further consequence of the difficulty in accessing electronic health records in a timely  
16 manner is that apart from the paper-based patient files, the other main source of  
17 information collected and used is-are personal notes often carried around by the individual  
18 practitioner, for example, those taken during the nursing handover or when taking a  
19 telephone call about an incoming patient admission. This has led to an inconsistent  
20 information collection process, where gaps in knowledge about service users have resulted.  
21 Such information deficits have led to practitioners repeatedly collecting the same  
22 information as their colleagues and thus duplicating work. Moreover, the gaps in knowledge  
23 about the patient which need to be addressed in order to plan a safe and effective  
24 discharge, are often not identified in a timely enough manner, and are instead only being  
25 flagged once discharge is imminent. We therefore suggest that the problem is one of  
26 knowledge sharing – and in particular, the breakdown in sharing knowledge and the  
27 resultant gaps in knowledge which appear.

28  
29  
30  
31  
32  
33  
34  
35  
36 Public policies advocate collaborative partnerships to foster more inclusive and 'joined-up'  
37 service delivery mechanisms.<sup>24</sup> This is largely premised on improved knowledge sharing,  
38 whereby actors are able to communicate information across occupational, organisational  
39 and sectoral boundaries, and meet a mutual set of objectives which should ultimately result  
40 in a more streamlined and integrated way of working.<sup>25</sup> Knowledge sharing can represent a  
41 powerful source of service integration, efficiency and, importantly safety. However, there  
42 are major challenges to this; communication 'breakdowns' represent a major barrier to  
43 service efficiency and safety; NHS 'collaboratives' and 'mandated networks' are bedevilled  
44 by professional cleavages and power differentials that inhibit knowledge sharing.<sup>25 26</sup>

45  
46  
47  
48  
49  
50  
51 There is growing evidence of the social and organisational processes involved in care  
52 transitions, including the importance of communication, yet this rarely takes account of the  
53 complex social and cultural dynamics of knowledge sharing. The literature on knowledge  
54

1  
2  
3  
4  
5  
6  
7 sharing relates, more broadly, to theories and concepts associated with inter-personal and  
8 occupational communication; knowledge exchange and brokering; translational research;  
9 and organisational learning. This diverse literature shows that various interpersonal, social  
10 and organisational factors influence knowledge sharing and learning within complex  
11 organisations, including the appreciation of distinct knowledge domains, social hierarchy,  
12 accessibility, and psychological safety and trust.<sup>27</sup> Knowledge is shown to be both 'slippery',  
13 where it is too difficult to codify, as well as 'sticky' or difficult to share across cultural or  
14 institutional boundaries.<sup>28 29</sup> Such research also highlights the various strategies for  
15 facilitating knowledge sharing, such as 'knowledge brokers' who can translate and transfer  
16 knowledge between isolated groups, information and communication technology to provide  
17 easy access and retrieval to knowledge and 'communities of practice' that engender cultural  
18 and organisational alignment through knowledge sharing.<sup>30 31</sup>

19  
20  
21  
22  
23  
24  
25  
26 Given the clinical risks associated with hospital discharge, it continues to be a national policy  
27 priority,<sup>32</sup> with the advice that care transitions should be seen as "a process not an isolated  
28 event"<sup>33</sup> involving the active participation of health and social care professionals, as well as  
29 service users and carers, to effectively plan and co-ordinate discharge. This whole system  
30 approach highlights the inter-dependency of individuals and organisations from different  
31 care delivery settings. However, the most common threats to timely and efficient hospital  
32 discharge are associated with notifying and organising 'external services'.<sup>34</sup> This highlights  
33 the importance of communication between care providers, yet the literature on hospital  
34 discharge offers little in way of this, especially in relation to discharge from acute mental  
35 health services. As highlighted previously, our literature review identified only one study  
36 which explicitly explored information and communication provision in relation to discharge  
37 between primary care providers and inpatient services in the USA.<sup>8</sup>

38  
39  
40  
41  
42  
43  
44  
45 It is important to understand the barriers and drivers to a patient's care transition not as  
46 linear casual chains within single or isolated care settings, but as complex and enmeshed  
47 'constellations' of factors found within and between care processes and teams. This  
48 includes the deeper 'darksides' of service organisation and delivery,<sup>35</sup> such as organisational  
49 boundaries and the shifting of responsibility and endemic problems of inter-professional  
50 and inter-organisational working, which typically relate to problems in communication or  
51  
52  
53  
54  
55  
56  
57  
58  
59  
60



1  
2  
3  
4  
5  
6  
7 knowledge sharing.<sup>36</sup> Glasby suggests three prominent factors influence the participation  
8 and co-ordination of these different stakeholders, which are also consistent with the whole  
9 systems and systems thinking approaches.<sup>37</sup> These include: 1) occupational factors, related  
10 to the particular knowledge, culture and practice domains of care providers, such as  
11 doctors, social workers and nurses; 2) organisational factors, related to the routine working  
12 patterns, facilities, capacities and resources of individuals agencies; and 3) compatibility and  
13 co-ordinating factors, related to how occupational, organisational and institutional factors  
14 align, including communication, decision-making and resources.  
15  
16  
17  
18

19  
20 Consequently, in piecing together the jigsaw of contemporary, complex, integrated  
21 healthcare, individual practitioners and healthcare workers must mediate boundaries to  
22 their knowledge sharing, which act to decipher what constitutes the expert and legitimate  
23 participation of particular groups of people in particular circumstances.<sup>38</sup> These boundaries  
24 can be “physical, cognitive, relational, structural, knowledge based or any other delineation  
25 that separates one boundary from another”.<sup>39</sup>  
26  
27  
28

29  
30 The resulting gaps have been described as structural holes, fissures and silos;<sup>40</sup> they act to  
31 “shine a light on how communication breaks down, interactivity fails or where teamwork is  
32 weak or floundering. Structural holes are often at the boundaries of organisational silos and  
33 this can enable and impede inter-professional relations or inter-unit knowledge  
34 transmission.<sup>40</sup> Boundaries or silos between different professions and professional practices  
35 have long been recognised (for example, medical tribalism;<sup>23 41</sup> they are known to inhibit  
36 knowledge sharing,<sup>36</sup> to the extent that they are “a significant brake on quality  
37 improvement initiatives”.<sup>42</sup>  
38  
39  
40  
41  
42

43 Crossing boundaries and connecting separate work and knowledge domains requires co-  
44 ordination for effective knowledge sharing to occur. Boundary crossing describes the actions  
45 and activities of a person, a group or an intervention that makes “transactions and  
46 interactions” across different sites.<sup>38</sup> Boundary crossing is a “challenge of negotiating and  
47 combining ingredients from different contexts to achieve hybrid solutions”,<sup>43</sup> and is a means  
48 of acquiring and controlling knowledge.<sup>17</sup> Thus for activities that require linking or brokering  
49 across and between boundaries, there is a need to search for connections in order to  
50 mobilise and share knowledge across the professional territories, and create links to avoid  
51  
52  
53  
54  
55

1  
2  
3  
4  
5  
6  
7 fragmentation, disconnection and ultimately, to prevent patient need from being left  
8 unaddressed.  
9

10  
11 Swan and Scarborough call for dedicated knowledge brokering roles, arguing that these  
12 enable “the transfer of knowledge across organisational and inter-organisational  
13 boundaries”.<sup>44</sup> Braithwaite et al. develop this line of argument further, referring to the  
14 dissemination of information via “grapevines”,<sup>45</sup> which interweave between individuals who  
15 are linked through a common purpose. Effective and timely communication, for instance,  
16 between hospital and the community mental health team is essential in ensuring  
17 appropriate transition from the hospital into the community. Yet, it is hypothesised that in  
18 the acute in-patient mental health experience, given the complexity and inter-agency  
19 working that occurs, there is no one or nothing carrying out this brokering role across the  
20 boundaries, and being the central information repository resource.  
21  
22  
23  
24  
25

26  
27 In other healthcare sectors, it is possible that the patient would be an ideal candidate to act  
28 as a knowledge broker and facilitate the sharing of knowledge and information about their  
29 care requirements and medical history to different practitioners – as it is the patient that is  
30 the constant across the various health and social care interactions that take place. However,  
31 a service user being admitted onto an acute mental health ward, often without their explicit  
32 consent (i.e. they are on a section of the Mental Health Act), is quite likely to lack the  
33 capacity and ability to act in this knowledge broker role at the moment of their admission  
34 onto the ward. For example, Owen and colleagues report that up to 80% of service users  
35 admitted to an inpatient ward in London lacked the capacity to make decisions regarding  
36 their own treatment.<sup>46</sup> –What’s more, as their care will have been delivered by multiple  
37 providers and agencies, as well as family members and significant others, there is not a  
38 central knowledge repository that can be drawn upon. Rather, information presented upon  
39 admission to the ward can be sketchy and incomplete, with practitioners and administrators  
40 searching for information from multiple sources. This is not just a waste of valuable  
41 resources, but also delays the admission procedure, and in turn, failure to identify complete  
42 knowledge about the patient can delay their treatment and eventual discharge from the  
43 ward.  
44  
45  
46  
47  
48  
49  
50  
51  
52  
53  
54  
55  
56  
57  
58  
59  
60

1  
2  
3  
4  
5  
6  
7 We suggest that knowledge sharing between the service user (where possible),  
8 professionals and carers during the admission and discharge planning processes can speed  
9 up the process and reduce the knowledge gaps which are known to create delays and  
10 blockages to discharge. We will focus on one acute mental health admission ward to  
11 investigate how the discharge planning and transition process can be enhanced, in terms of  
12 making discharge more effective through improved knowledge sharing. Knowledge sharing  
13 requires collaboration and co-ordination in order to be effective<sup>19-22</sup>, as planned rather than  
14 ad-hoc actions are required in order to address the difficulties in information sharing in  
15 fragmented care settings<sup>23</sup>. As we have already described, staff on the ward are known to  
16 keep 'personal notes' containing information about a patient. We will test this assertion  
17 through the development, implementation and utilisation of a knowledge collection  
18 proforma that will be completed by healthcare staff upon the service user's arrival onto the  
19 ward, we will seek to formalise these personal notes, so that they are stored in a patient's  
20 (paper-based) notes folder rather than remain in the pocket of a healthcare practitioner.  
21 We do this in anticipation of the implementation of the recently announced electronic  
22 health record, intended to be in practice by 2015, and the vision of a paperless NHS by  
23 2018.<sup>46</sup> This study is the first step towards the production of a shared knowledge collection  
24 resource, which can be used by all health and social care practitioners involved in the  
25 admission and discharge of patients from an acute mental health ward. If this is shown to be  
26 effective, further funding will be sought to develop and roll out an electronic version.  
27  
28  
29  
30  
31  
32  
33  
34  
35  
36  
37  
38  
39  
40

## 41 METHODS AND ANALYSIS

42  
43 Service users will be involved at every stage of the planning and management of the study.  
44 We will convene a small group of approximately five members who have had recent  
45 experience of being admitted and discharged from hospital. This group will be facilitated by  
46 a member of the research team and will meet approximately bimonthly. They will discuss  
47 the planning and development of the project and intervention, be involved in data analysis  
48 and disseminate the study findings to service user forums and in service user focused  
49 publications. They will also be invited to be involved in the development of any subsequent  
50 research grant applications and follow on studies should these occur. If any members of the  
51  
52  
53  
54  
55

service user group wish to join the full study management team, they will be enabled to do this; otherwise their views and work will be relayed to the full team by the individual who facilitates the group. Service users will be paid a 'disruption' fee to cover their time and travel costs incurred through being involved in the study.

This study follows an improvement science approach. Although a relatively new term, which is often interchangeably used along with translational science, implementation science, evidence-based practice, knowledge translation, and research utilisation, the overarching goal of improvement science is to ensure that quality improvement efforts are evidence based.<sup>47</sup> Improvement science offers a rigorous yet practical approach to understanding and implementing quality improvement, as it "inhabits the sphere between research and quality improvement by applying research methods to help understand what impacts on quality improvement".<sup>48</sup> As such, it "focuses on systematically and rigorously exploring 'what works' to improve quality in healthcare and the best ways to measure and disseminate this to ensure positive change".<sup>48</sup>

The study will address the following ~~hypothesis~~ research question:

How can ~~in~~ inappropriate discharge and subsequent readmission ~~will~~ be reduced if ~~through~~ greater knowledge ~~is shared~~ sharing, ~~known and utilised to support~~ collaboration during inpatient admission and discharge planning?"?

Secondary objectives are:

1. To explore the knowledge sharing process and procedure upon admission to an adult acute mental health ward.
2. To seek to improve knowledge sharing to prevent delayed discharge because of information gaps.

Qualitative data ~~will be~~ collected will seek to understand the complex processes and blockages ~~involved occurring during~~ in knowledge sharing during in-linked to a patient's admission and discharge from the acute ward. This will then be used enable by the research team to produce a knowledge collection proforma, which will aim to prompt healthcare

1  
2  
3  
4  
5  
6  
7 practitioners to be aware of knowledge gaps in the patient's history, and raise questions  
8 /take action where this is needed.  
9

10  
11 Using a mixed methods approach, an in-depth understanding of the complex processes  
12 associated with being admitted and discharged from inpatient mental health wards will be  
13 ascertained. Healthcare practitioners' (acute and community based) perceptions of the  
14 appropriateness of this new knowledge collection tool will be evaluated using qualitative  
15 methods, and will be supplemented by quantitative data analysis, through baseline and  
16 repeat measures of anonymised patient length of stay and readmission rates.  
17  
18  
19

20  
21 Anonymised baseline data collected at the start of the study will be repeated at the  
22 completion of the pilot, to measure any change has occurred in both average length of stay,  
23 and patient readmission rates. Readmission is defined locally as 'patient readmitted within a  
24 month of initial discharge'. Length of stay and readmission rate measures have been  
25 selected as they are both aligned to a CQUIN target (21 days median length of stay) and are  
26 requested by the local Clinical Commissioning Groups to inform their decision-making.  
27  
28  
29

30  
31 The project is structured across a number work packages. The initial phase of the project  
32 will identify the relevant stakeholders and information sources involved in mental health  
33 admission and discharge. Subsequent work will engage and work with clinicians and  
34 healthcare workers to develop the intervention (the knowledge capture proforma) which  
35 will be piloted in the latter phases of the project. Following this we will ask those involved to  
36 reflect on their experiences of using the proforma, so that this can be used to further  
37 develop the intervention and apply for further funds for a larger scale study.  
38  
39  
40  
41

- 42 • *Work package 1* will see anonymised baseline data taken on the average length of  
43 stay on the study site (Ward A) and readmission rates over the last calendar year.  
44 The study team will carry out a series of qualitative interviews with clinicians and  
45 healthcare practitioners working in acute and community care settings who are  
46 involved in the admission and discharge processes of patients into/out of Ward A.  
47 Additionally, any admission and discharge packs, or other knowledge collation  
48 documents, will be collected and studied, to identify what information is currently  
49 assembled, by whom and when, where it is stored and when it is used.  
50  
51  
52  
53  
54  
55  
56  
57  
58  
59  
60

- 1  
2  
3  
4  
5  
6  
7  
8  
9  
10  
11  
12  
13  
14  
15  
16  
17  
18  
19  
20  
21  
22  
23  
24  
25  
26  
27  
28  
29  
30  
31  
32  
33  
34  
35  
36  
37  
38  
39  
40  
41  
42  
43  
44  
45  
46  
47  
48  
49  
50  
51  
52  
53  
54  
55  
56  
57  
58  
59  
60
- *Work package 2* will draw on the learning from work package one, and will involve the production of a new knowledge capture proforma to be used at the time of the patient's admission onto the acute ward. Following the initial analysis of the data from work package one, the new proforma will be co-produced with members of the acute and community teams in a series of workshops. By co-designing the proforma in this manner – similar to a user-based design approach, it ensures that the resulting product is fit for use by the practitioners, as they have had a role in co-producing the outcome.
  - *Work package 3* will involve the roll-out of the knowledge collection proforma produced in work package two. Its introduction will be supported by a series of short presentations made by the study team to healthcare staff working in Ward A, as well as to those healthcare staff who are involved in the admission or discharge of patients from Ward A members of the care team. The proforma will be piloted for two calendar months on Ward A.
  - *Work package 4* will comprise of a series of evaluative qualitative interviews with the clinicians and practitioners who will have been using the new knowledge capture proforma. These interviews will collect data on perceptions and experiences of using the proforma, and whether practitioners feel its implementation and use has enhanced the admission and discharge ~~process in relation to being able to process through~~ having access to more cohesive knowledge about the patient. Repeated baseline measures on anonymised length of stay and readmission rates will be taken, to cover the pilot dates, in order to provide quantitative evidence of any effect that the form may have had.

~~The study follows a Plan-Do-Study-Act cycle.~~

~~Work packages 1 and 2 fall under the PLAN stage; work package 3 comprises of the DO stage; work package 4 fulfils the STUDY stage, whilst the final ACT stage will be covered in a future funding application, to develop this pilot study further, and to cover its rollout and evaluation across the whole of the NHS Trust involved.~~

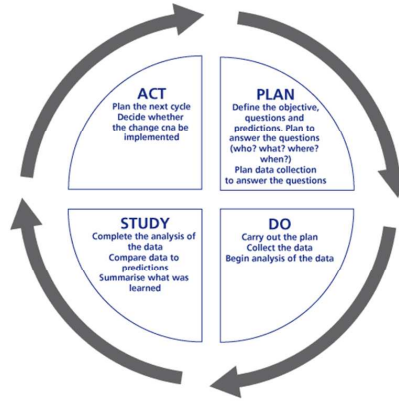

Formatted: Font: (Default) +Body (Calibri),  
Font color: Black

~~(Image courtesy of NHS Scotland)  
<http://uat.qihub.scot.nhs.uk/programmes/improvement-tools/search-results/improvement-tool.aspx?id=66>~~

The study follows a Plan-Do-Study-Act cycle.

Work packages 1 and 2 fall under the PLAN stage; work package 3 comprises of the DO stage; work package 4 fulfils the STUDY stage, whilst the final ACT stage will be covered in a future funding application, to develop this pilot study further, and to cover its rollout and evaluation across the whole of the NHS Trust involved.

### Study configuration

This is a single site study; the predominant focus is on a single acute mental health ward. However, in order to respond to the hypothesis and research objectives, it will also be necessary to include healthcare staff working in community care (employed by the same NHS Trust as the ward based staff) who are involved in the referral and admission/discharge process into / from Ward A.

1  
2  
3  
4  
5  
6  
7 Ward A is a busy acute mental health ward in an urban setting within the UK. It has 20 beds  
8 for male patients. Patients typically have been diagnosed with schizophrenia, bipolar  
9 disorder, severe depression or borderline or anti-social personality disorder, often with co-  
10 morbid substance misuse problems and sometimes with other physical health problems.  
11  
12

### 13 *Recruitment*

14  
15  
16 Participants for the study will all be employed by the NHS Trust, and either be working on  
17 Ward A or be a member of a community team (e.g. Crisis Teams, Community Assessment  
18 and Treatment, Early Intervention in Psychosis, Recovery and Assertive Outreach, CMHTs)  
19 which admits service users to the ward or is involved in their care following discharge. No  
20 service users or their carers / family members will be recruited to participate in the study at  
21 this stage. The initial approach will be from AC, who is a consultant on the ward, and will be  
22 made verbally and followed up in writing, accompanied by a participant information sheet  
23 and consent form.  
24  
25  
26  
27  
28

### 29 *Sample size and justification*

30  
31  
32 Sample size is determined by the number of relevant stakeholders working in / into Ward A,  
33 rather than by power calculations or expectations about study dropout. The sample size will  
34 be approximately 50 healthcare practitioners. This number covers all those healthcare  
35 workers who would reasonably be expected to have some interaction with Ward A in  
36 relation to the admission or discharge of a patient.  
37  
38  
39

### 40 *Eligibility criteria*

41  
42  
43 In order to be eligible to be involved in the study, participants should be employed by the  
44 NHS Trust and have a role in the admission and/or discharge of patients from Ward A.  
45  
46

47 Consequently, in order to be eligible to be included in the study, participants should be:

- 48  
49
- 50 · Aged between 18 and 65 years of age.
  - 51 · Working in the NHS.
  - 52 ~~53 · Able to give consent.~~
  - 54 · Involved in the admission and/or discharge of patients from Ward A
- 55  
56  
57  
58  
59  
60



1  
2  
3  
4  
5  
6  
7 Conversely, individuals will be excluded from participating in the study if they are not  
8 employed by the NHS Trust; have no experience of admission / discharge of patients into /  
9 from Ward A, and are unable to give consent.  
10

11 All participants will provide informed consent before being enrolled in the study.  
12  
13

#### 14 *Data collection*

15  
16  
17 As illustrated in table 1, two sets of qualitative interviews will be held with all health-~~and~~  
18 ~~social~~ care practitioners who interact with Ward A regarding the admission and discharge of  
19 patients; these are scheduled to take place during work packages one and three. Qualitative  
20 interviews have been chosen as a data collection technique as enable the space for  
21 reflective reporting and open discussion of the phenomena under investigation. To this end,  
22 a topic guide will be utilised (see table 2 for an indicative illustration of the topics that might  
23 be covered). Interviews will be carried out by NW and ER, recorded with participants'  
24 consent, and transcribed verbatim.  
25  
26  
27  
28  
29

30  
31 Work package two involves a series of co-design workshops with the health-~~and social~~ care  
32 practitioners previously interviewed. These workshops will be practical in focus, and will  
33 seek to produce a knowledge capture proforma, that will ensure that knowledge regarding  
34 admission and discharge is shared between the different health-~~and social~~ care  
35 practitioners. Co-design is founded on the principle that “making it “better” is possible if  
36 users are involved in the design process.<sup>49</sup> The approach, while practical, also enables  
37 discussion of “how well people understand [the intervention being designed], how they feel  
38 about it while they are using it, how well it serves its purpose, and how well it fits into the  
39 context in which they are using it”.<sup>49</sup> It is this “knowledge of the experience” in relation to  
40 the problems and potential solutions to knowledge sharing and capture in relation  
41 admission and discharge from the acute mental health ward, that is “unique and  
42 precious”.<sup>49</sup>  
43  
44  
45  
46  
47  
48  
49

50 Marshall and colleagues argue how “improvement science needs a genuine partnership  
51 between academics and front-line practitioners.<sup>50</sup> Researchers bring scepticism, scientific  
52 rigour, and methodological technical expertise, whereas practitioners bring content  
53  
54  
55  
56  
57  
58  
59  
60

knowledge, a thorough understanding of working contexts, and practical wisdom. Academics and service partners need to collaborate to design, undertake, and interpret the work of improvement science". Together, the two approaches of co-design and improvement science offer potential to produce a step change in knowledge sharing, and reduce the delays to discharge caused by communication failure.

Table 1: Study Regime

|                                                                                                        | Timeline                        | Research team activities                                                                                                                                                   | Participant involvement                                                                                                                                                                                                                                                                       |
|--------------------------------------------------------------------------------------------------------|---------------------------------|----------------------------------------------------------------------------------------------------------------------------------------------------------------------------|-----------------------------------------------------------------------------------------------------------------------------------------------------------------------------------------------------------------------------------------------------------------------------------------------|
| Work package 1:<br>   | Late Autumn 2013 – January 2014 | <ul style="list-style-type: none"> <li>• Baseline data collection</li> <li>• Collection &amp; analysis of admission and discharge documents</li> <li>• Analysis</li> </ul> | <ol style="list-style-type: none"> <li>Participants to be identified (by AC, acting as gatekeeper to the clinical setting)</li> <li>Invitations issued, accompanied by Participant Information Sheet and Consent Form)</li> <li>Interview scheduled</li> <li>Interview takes place</li> </ol> |
| Work package 2:<br> | January – February 2014         | <ul style="list-style-type: none"> <li>• Analysis</li> </ul>                                                                                                               | <ol style="list-style-type: none"> <li>Participants invited to participate in co-production / co-design workshops for knowledge capture tool / proforma</li> <li>Workshops arranged and take place</li> </ol>                                                                                 |

|                                                                                                          |                            |                                                                                                                                 |                                                                                                             |
|----------------------------------------------------------------------------------------------------------|----------------------------|---------------------------------------------------------------------------------------------------------------------------------|-------------------------------------------------------------------------------------------------------------|
| <p>Work package 3:</p>  | <p>March – April 2014</p>  | <ul style="list-style-type: none"> <li>• Roll out of the knowledge capture tool, supported by training presentations</li> </ul> |                                                                                                             |
| <p>Work package 4:</p>  | <p>May – November 2014</p> | <ul style="list-style-type: none"> <li>• Repeat measures</li> <li>• Analysis</li> <li>• Reporting and dissemination</li> </ul>  | <p>i. Staff interviews regarding their perceptions and experiences of using the knowledge capture tool.</p> |

Table 2: Interview topic guides

| Topics to be covered in Work package 1 interviews                                                                                                                                                                                                                                                                                                                                                                                                                                                                                | Topics to be covered in Work package 3 interviews                                                                                                                                                                                                                                                                                                                                                                                                                                                                                                           |
|----------------------------------------------------------------------------------------------------------------------------------------------------------------------------------------------------------------------------------------------------------------------------------------------------------------------------------------------------------------------------------------------------------------------------------------------------------------------------------------------------------------------------------|-------------------------------------------------------------------------------------------------------------------------------------------------------------------------------------------------------------------------------------------------------------------------------------------------------------------------------------------------------------------------------------------------------------------------------------------------------------------------------------------------------------------------------------------------------------|
| <ul style="list-style-type: none"> <li>• Experiences of patient admission process onto Ward A – what is involved, who is involved, how long does it take?</li> <li>• Perceived problems with the patient admission process.</li> <li>• How, when and by whom is knowledge and information is gained, stored and shared?</li> <li>• Experiences of patient discharge process from Ward A – what is involved, who is involved, how long does it take?</li> <li>• Perceived problems with the patient admission process.</li> </ul> | <ul style="list-style-type: none"> <li>• About using the new knowledge capture form</li> <li>• Did knowledge sharing in relation to patient admission process onto Ward A improve whilst the form was being used?</li> <li>• Any problems with the form?</li> <li>• How might it be improved?</li> <li>• Having used the form, how, when and by whom is knowledge and information is gained, stored and shared?</li> <li>• Following using the form, what have been the experiences of patient discharge process from Ward A – what is involved,</li> </ul> |

1  
2  
3  
4  
5  
6  
7  
8  
9  
10  
11  
12  
13  
14  
15  
16  
17  
18  
19  
20  
21  
22  
23  
24  
25  
26  
27  
28  
29  
30  
31  
32  
33  
34  
35  
36  
37  
38  
39  
40  
41  
42  
43  
44  
45  
46  
47  
48  
49  
50  
51  
52  
53  
54  
55  
56  
57  
58  
59  
60

|                                                                                                                                                                                                                               |                                                                                                                                                                                                          |
|-------------------------------------------------------------------------------------------------------------------------------------------------------------------------------------------------------------------------------|----------------------------------------------------------------------------------------------------------------------------------------------------------------------------------------------------------|
| <ul style="list-style-type: none"> <li>• How, when and by whom is knowledge and information is gained, stored and shared?</li> <li>• About delays in discharge – how often? Caused by what? What knock-on effects?</li> </ul> | <ul style="list-style-type: none"> <li>• who is involved, how long does it take?</li> <li>• Have delays in discharge through gaps in knowledge about a patient's circumstances, been reduced?</li> </ul> |
|-------------------------------------------------------------------------------------------------------------------------------------------------------------------------------------------------------------------------------|----------------------------------------------------------------------------------------------------------------------------------------------------------------------------------------------------------|

### Data analysis

The interview data will be analysed using conventional qualitative methods, and will identify analytical patterns from across individual respondent and wider service.<sup>51 52</sup> Analysis will be inductive, although it will be influenced by the study's theoretical framework of knowledge brokering and knowledge mobilisation.<sup>31 53-55</sup>

Thematic analysis has been chosen as it “provides a concise, coherent, logical, non-repetitive and interesting account of the story the data tell”.<sup>56</sup> Although time intensive - it requires the research team to spend time engaging with the data, reading and rereading the interview transcriptions and listening to the audio recordings of interviews – we believe that it offers unparalleled advantages in ‘getting to know’ your data. In turn, this “generates understanding, insight and familiarity, which are the building blocks of analysis”.<sup>56</sup> The research team will start to identify and code (by highlighting) parts or chunks of the data that they deem to be about the same topic, concept or idea. It is likely that many sections of the data will be given multiple codes, implying that the section/extract is about more than one topic, or idea. As codes are developed it is also important to revisit the rest of the data to see if that code also applies to other parts of the data. Initially, the data will be analysed separately by each member of the research team; following initial coding, the research team will hold regular data meetings in which they will work collaboratively on the analysis of the interview materials.

Due to the need for the research team to analyse the data collaboratively, a CAQDAS (Computer Assisted Qualitative Data Analysis) package, NVivo, will be used. This will allow each member of the research team to add their own comments and analysis. The use of NVivo allows for sections of the transcript to be tagged, or highlighted and named with a

1  
2  
3  
4  
5  
6  
7 certain code or label; these programmes do not undertake the analysis of the data for you,  
8 but they do allow the electronic data to be coded and searched, for notes to be written to  
9 accompany codes and data extracts, for the data to be more easily navigated, and for the  
10 accumulating analytical work to be located on a single data corpus. While early reading and  
11 immersion in the data can be done using hard copies of the transcripts, once a number of  
12 initial codes have been generated, transcripts will be imported into NVivo, with all coding of  
13 the data undertaken on the electronic versions of the transcripts from then on.

14  
15  
16  
17  
18 Following this preliminary analysis stage, in which all the data extracts will have been coded  
19 in a general sense, data will again be examined in order to identify the wider themes and  
20 analytical narrative.  
21  
22

23  
24 The quantitative data from the baseline and repeat measures (Length of Stay; Readmission  
25 Rates) will be analysed simply; given the complexity of the admission/discharge process, it  
26 will not be possible to statistically show the 'effect' of the proforma due to so many  
27 confounding influences. However, by running simple statistical tests (such as median length  
28 of stay, and average readmission rates) over two time periods (before / during the use of  
29 the proforma), we may be able to see some difference, which would then suggest the need  
30 for more detailed, subsequent investigation if the research were to be repeated on a larger  
31 scale.  
32  
33  
34  
35  
36

### 37 **ETHICS AND DISSEMINATION**

38  
39 Whilst the ethical issues faced in policy-oriented, qualitative research are not of the same  
40 order as those facing research involving invasive clinical interventions, this is not to say that  
41 they can be brushed aside. The ethical and design issues that are of particular importance in  
42 this kind of research relate to the need to recognise the ways in which the social  
43 relationships relating to the phenomena being studied may impact on the research process,  
44 by impeding some participants from fully expressing their views while encouraging others to  
45 do so.  
46  
47  
48  
49

50  
51 A key issue is that participants in this research will be asked to comment frankly on  
52 something which is a core part of their work, as this relates to the actions of other  
53  
54  
55  
56  
57  
58  
59  
60

1  
2  
3  
4  
5  
6  
7 individuals and organisations involved in knowledge sharing and brokering during the  
8 admission and discharge processes. From the point of view of us as researchers, of good  
9 research practice, and of the participants themselves, it is clearly important that those  
10 involved are as frank as possible, so that we might get a clear picture of the what has helped  
11 and obstructed the knowledge brokering during admission and discharge process in the  
12 particular context of acute mental health. If some respondents are franker than others, we  
13 may get a skewed view, and of the role of different factors and individuals in the process.  
14 This quandary is amplified by the fact that there may well be entrenched power  
15 relationships within the groups of individuals being studied, with certain parties exerting  
16 considerably more influence than others, which may make those less influential parties  
17 more reluctant to be frank. For example, senior consultants are likely to be perceived by  
18 other participants, as more powerful than a healthcare assistant or an occupational  
19 therapist. For this reason, we will carefully manage group dynamics during the co-design  
20 workshops, to ensure that all parties are able to equally and fully participate.  
21  
22  
23  
24  
25  
26  
27

28  
29 When discussing the research with participants at the recruitment stage, we will emphasise  
30 that the views of all involved are equally important, and that we will make every effort to  
31 use what they tell us in a non-attributable way.  
32  
33

34  
35 ~~Service users will be involved at every stage of the planning and management of the study.~~  
36 ~~We will convene a small group of approximately five members who have had recent~~  
37 ~~experience of being admitted and discharged from hospital. This group will be facilitated by~~  
38 ~~a member of the research team and will meet approximately bimonthly. They will discuss~~  
39 ~~the planning and development of the project and intervention, be involved in data analysis~~  
40 ~~and disseminate the study findings to service user forums and in service user focused~~  
41 ~~publications. They will also be invited to be involved in the development of any subsequent~~  
42 ~~research grant applications and follow on studies should these occur. If any members of the~~  
43 ~~service user group wish to join the full study management team, they will be enabled to do~~  
44 ~~this; otherwise their views and work will be relayed to the full team by the individual who~~  
45 ~~facilitates the group. Service users will be paid a 'disruption' fee to cover their time and~~  
46 ~~travel costs incurred through being involved in the study~~  
47  
48  
49  
50  
51  
52

53  
54 *Dissemination*  
55  
56  
57  
58  
59  
60

1  
2  
3  
4  
5  
6  
7 Study results will be published and disseminated in a variety of ways. A report of the study  
8 will be produced, including an executive summary which will be distributed to participants  
9 and any other interested party. Peer-reviewed publications in academic outlets will be  
10 pursued, as will outputs in practitioner-oriented publications. Participants will not be  
11 identified in any publications.  
12  
13

14  
15 This study sets out to co-produce a solution to an enduring problem in healthcare practice.  
16 Knowledge sharing amongst different health ~~and social~~ care teams is neither a new  
17 phenomenon nor something that is recognised as easily solved. It is also something that  
18 many researchers before us have attempted to improve. However, our focus on knowledge  
19 sharing upon admission and discharge from an acute mental health ward, informed by  
20 improvement science and co-design approaches, offers a potential solution that is locally  
21 produced and owned. We hope that this approach will offer sustained benefits to patients  
22 and health ~~and social~~ care practitioners.  
23  
24  
25  
26  
27

#### 28 **ACKNOWLEDGMENTS, COMPETING INTERESTS & FUNDING**

29  
30  
31 **Authors' contributions:** ER led the development of the study protocol and this paper. NW,  
32 JW, KG and AC commented on drafts of the protocol and the paper.  
33  
34

35 **Funding statement:** This work was supported by Nottingham University Business School's  
36 'Spark' research fund. ER and JW are members of NIHR CLAHRC East Midlands, and as such,  
37 their involvement was funded by the NIHR. The views expressed are those of the authors  
38 and not necessarily those of the NHS, the NIHR, or the Department of Health.  
39  
40  
41

42 **Competing interests statement:** AC is the main consultant psychiatrist on the ward where  
43 the study will be conducted, and is the problem owner, having identified the issue requiring  
44 improvement and bringing it to other members of the research team. KG is a senior nurse  
45 on the ward. To maintain objectivity and minimise threats of bias, neither AC nor KG will be  
46 involved in data collection or preliminary analysis. They ~~and~~ will only have access to  
47 anonymised data that is used by the research team in producing the analytical narrative. At  
48 all times, the team will be mindful of any potential loss of objectivity, and as such, data  
49 analysis will be led by ER and NW.  
50  
51  
52  
53  
54  
55

## REFERENCE LIST

1. Commission CQ. Board Paper: Thematic reviews – future topics and a proposals for a more systematic approach to topic selection, 2013.
2. Chopra A. Are our mental health services in crisis? *Nottinghamshire Fabian Society*, 2013.
3. Hudson JaW, M. The National AMHP Survey 2012: Final Report – Stress and the Statutory Role: Is There a Difference Between Professional Groups? , 2012.
4. Centre HaSCI. Inpatients formally detained in hospitals under the Mental Health Act 1983, and patients subject to supervised community treatment, Annual figures, England, 2011/12 2013.
5. Thornicroft G, Farrelly S, Szmukler G, Birchwood M, Waheed W, Flach C, et al. Clinical outcomes of Joint Crisis Plans to reduce compulsory treatment for people with psychosis: a randomised controlled trial. *The Lancet* 2013;381(9878):1634-41.
6. Cook JA, Copeland ME, Hamilton MM, Jonikas JA, Razzano LA, Floyd CB, et al. Initial outcomes of a mental illness self-management program based on wellness recovery action planning. *Psychiatr Serv* 2009;60(2):246-9.
7. Priebe S, Fakhoury W, Watts J, Bebbington P, Burns T, Johnson S, et al. Assertive outreach teams in London: patient characteristics and outcomes. Pan-London Assertive Outreach Study, part 3. *The British journal of psychiatry : the journal of mental science* 2003;183:148-54.
8. Durbin J, Barnsley J, Finlayson B, Jaakkimainen L, Lin E, Berta W, et al. Quality of Communication Between Primary Health Care and Mental Health Care: An Examination of Referral and Discharge Letters. *J Behav Health Ser R* 2012;39(4):445-61.
9. Jerpersen S, Chang, T., Donegan, T., Gray, K., Kvdinoff, T., McGain, L., Gant, D. Reflections on facilitated discharge from a mental health service. *Australasian Psychiatry* 2009;17(3):195-201.
10. Impey MaM, E. Delayed discharge from mental health inpatient care in the UK *Mental Health Practice* 2013;16(9):31-35.
11. Lewis R, Glasby J. Delayed discharge from mental health hospitals: results of an English postal survey. *Health & social care in the community* 2006;14(3):225-30.
12. Steffen S, Kusters, M., Becker, T., Pvschner, B. Discharge planning in mental health care: a systematic review of the literature. *Acta Psychiatrica Scandinavica* 2009;120:1-9.
13. Martin ML, Jensen, E., Coatsworth-Puspoky, R., Forchwick, C., Lysiak-Globe, T., Beal, G. Integrating an evidence based research intervention in the discharge of mental health clients. *Archives of Psychiatric Nursing* 2007;21(2):101-11.
14. Meehan J, Kapur N, Hunt IM, Turnbull P, Robinson J, Bickley H, et al. Suicide in mental health in-patients and within 3 months of discharge. National clinical survey. *The British journal of psychiatry : the journal of mental science* 2006;188:129-34.
15. Gainsbury C. Calculating the cost of mental health. *Health Services Journal*, 2012.
16. England CSINIfMHi. A positive outlook: a good practice toolkit to improve discharge from inpatient mental health care, 2007.
17. Waring J, Currie G, Crompton A, Bishop S. An exploratory study of knowledge brokering in hospital settings: Facilitating knowledge sharing and learning for patient safety? *Social Science & Medicine* 2013;98(0):79-86.
18. Perrow C, Wilensky HL, Reiss AJ. *Complex organizations: A critical essay*: McGraw-Hill New York, 1986.
19. Parent R, Roy M, St-Jeaques D. A systems-based dynamic knowledge transfer capacity model. *Journal of Knowledge Management* 2007;11(6):81-93.



20. Jensen CB. Sociology, systems and (patient) safety: knowledge translations in healthcare policy. *Sociology of Health & Illness* 2008;30(2):309-24.
21. Ward V, Smith S, House A, Hamer S. Exploring knowledge exchange: A useful framework for practice and policy. *Soc. Sci. Med.* 2011:1-8.
22. Wilkinson H, Gallagher M, Smith M. A collaborative approach to defining the usefulness of impact: lessons from a knowledge exchange project involving academics and social work practitioners. *Evidence & Policy* 2012;8(3):311-27.
23. Sullivan H, Williams P. Emerald Article: Whose kettle?: Exploring the role of objects in managing and meditating the boundaries of integration in health and social care. *Journal of Health Organization and Management* 2012;26(6):697-712.
24. Klijn E-H, Teisman GR. Institutional and Strategic Barriers to Public—Private Partnership: An Analysis of Dutch Cases. *Public money and Management* 2003;23(3):137-46.
25. Bate SP, Robert G. Knowledge Management and communities of practice in the private sector: lessons for modernising the National Health Service in England and Wales. *Public Administration* 2002;80(4):643-63.
26. Addicott R, McGivern G, Ferlie E. Networks, Organizational Learning and Knowledge Management: NHS Cancer Networks. *Public Money & Management* 2006;26(2):87-94.
27. Cross R, Borgatti SP. The ties that share: Relational characteristics that facilitate information seeking. *Social capital and information technology* 2004:137-61.
28. Chumer M, Willmott H. Managing knowledge: critical investigations of work and learning: New York, 2000.
29. Swan JaS, H. Explaining the diffusion of knowledge management: The role of fashion. *British Journal of Management* 2001;12:3-12.
30. Lave J. Situating learning in communities of practice. In: Resnick L, Levine J, Teasley S, editors. *Perspectives on socially shared cognition*. Washington, DC, US: American Psychological Association, 1991.
31. Lomas J. The in-between world of knowledge brokering. *BMJ* 2007;334(Jan 2007):129-32.
32. Commission A. The way to go home; rehabilitation and remedial services for older people. London, 2000.
33. Health Do. Discharge from hospital: Pathway, Process and Practice. London: The Stationary Office, 2003.
34. Agency NPS. National Reporting and Learning System Quarterly Data Summary - England, Issue 13. London: NPSA, 2009.
35. Vaughan D. The Dark Side of Organizations: Mistake, Misconduct and Disaster. *Annu. Rev. Sociol.* 1999;25:271-305.
36. Currie G, Waring J, Finn R. The limits of knowledge management for UK public services modernization: the case of patient safety and service quality. *Public Administration* 2008;86(2):363-85.
37. Glasby J. *Hospital discharge: integrating health and social care*: Radcliffe Publishing, 2003.
38. Akkerman SF, Bakker A. Boundary Crossing and Boundary Objects. *Review of Educational Research* 2011;81(2):132-69.
39. Chreim S, Langley A, Comeau-Vallee M, Huq J-L, Reay T. Leadership as boundary work in healthcare teams. *Leadership* 2013;9(2):201-28.
40. Braithwaite J. Between-group behaviour in health care: gaps, edges, boundaries, disconnections, weak ties, spaces and holes. A systematic review. *BMC Health Services Research* 2010;10(330):1-11.
41. Long JC, Cunningham FC, Braithwaite J. Bridges, brokers and boundary spanners in collaborative networks: a systematic review. *BMC Health Services Research* 2013;13(158):1-13.
42. Powell AE, Davies HTO. The struggle to improve patient care in the face of professional boundaries. *Soc. Sci. Med.* 2012;75:807-14.

- 1
- 2
- 3
- 4
- 5
- 6
- 7 43. Engeström Y, Engeström R, Kärkkäinen M. Polycontextuality and boundary crossing in expert cognition: Learning and problem solving in complex work activities. *Learning and instruction* 1995;5(4):319-36.
- 8
- 9 44. Swan J, Scarbrough H. The politics of networked innovation. *Human Relations* 2005;58(7):913-42.
- 10
- 11 45. Braithwaite J, Runciman WB, Merry AF. Towards safer, better healthcare: harnessing the natural properties of complex sociotechnical systems. *Qual Saf Health Care* 2009;18:37-41.
- 12
- 13 46. Centre HaSCI. Standards for the clinical structure and content of patient records, 2013.
- 14 47. Shojania KG, Grimshaw JM. Evidence-based quality improvement: the state of the science. *Health affairs* 2005;24(1):138-50.
- 15
- 16 48. Foundation TH. Improvement Science: research scan. London: The Health Foundation, 2011.
- 17
- 18 49. Bate P, Robert G. Experience-based design: from redesigning the system around the patient to co-designing services with the patient. *Quality and Safety in Health Care* 2006;15(5):307-10.
- 19
- 20 50. Marshall M, Pronovost P, Dixon-Woods M. Promotion of improvement as a science. *The Lancet* 2013;381(9864):419-21.
- 21
- 22 51. Ritchie J, Spencer L. Qualitative data analysis for applied policy research, Bryman A., Burgess RG, Analyzing qualitative data, 1994, 173-194: Routledge, London.
- 23
- 24 52. Huberman A, Miles M. Data Management and Analysis Methods in: Denzin, NK and Lincoln, YS (eds.)(1998) Collecting and Interpreting Qualitative Materials: Sage Publications, Thousand Oaks, 1998.
- 25
- 26 53. Carlile PR. A Pragmatic View of Knowledge and Boundaries: Boundary Objects in New Product Development\*. *Organization Science* 2002;13(4):442-45.
- 27
- 28 54. Davies HTO, Nutley SM, Walter I. Why 'knowledge transfer' is misconceived for applied social research. *J Health Serv Res Policy* 2008;13(3):188-90.
- 29
- 30 55. Tetroe J, Graham ID. How to Translate Health Research Knowledge into Effective Healthcare Action. *Healthcare Quarterly* 2007;10(3):20-22.
- 31
- 32 56. Rowley E. Protocol for a qualitative study exploring the roles of 'Diffusion Fellows' in bridging the research to practice gap in the Nottinghamshire, Derbyshire and Lincolnshire Collaboration for Leadership in Applied Health Research and Care (CLAHRC-NDL). *BMJ* 2012;2012(2):1-7.
- 33
- 34
- 35
- 36
- 37
- 38
- 39
- 40
- 41
- 42
- 43
- 44
- 45
- 46
- 47
- 48
- 49
- 50
- 51
- 52
- 53
- 54
- 55
- 56
- 57
- 58
- 59
- 60
